# Supplementary material for: Integrated genome-wide analysis of expression quantitative trait loci aids interpretation of genomic association studies
Source: PubMed Central journal article supplement (PMC5264466; doi:10.1186/s13059-016-1142-6), 2017-01-25
Supplement: 13059_2016_1142_MOESM1_ESM.pdf [file 13059_2016_1142_MOESM1_ESM.pdf]

Supplementary Materials

## **Integrated genome-wide analysis of expression Quantitative Trait Loci aids interpretation of genomic association studies**

**Roby Joehanes<sup>1,2,3\*</sup>, Xiaoling Zhang<sup>1,10,12\*</sup>, Tianxiao Huan<sup>1</sup>, Chen Yao<sup>1</sup>, Sai-xia Ying<sup>2</sup>, Quang Tri Nguyen<sup>2</sup>, Cumhuri Yusuf Demirkale<sup>2</sup>, Michael L. Feolo<sup>4</sup>, Nataliya R. Sharopova<sup>4</sup>, Anne Sturcke<sup>4</sup>, Alejandro A. Schäffer<sup>4</sup>, Nancy Heard-Costa<sup>5</sup>, Han Chen<sup>6,10</sup>, Po-ching Liu<sup>7</sup>, Richard Wang<sup>7</sup>, Kimberly A. Woodhouse<sup>7</sup>, Kahraman Tanriverdi<sup>8</sup>, Jane E. Freedman<sup>8</sup>, Nalini Raghavachari<sup>9</sup>, Josée Dupuis<sup>1,10</sup>, Andrew D. Johnson<sup>1</sup>, Christopher J. O'Donnell<sup>1,11</sup>, Daniel Levy<sup>1\*</sup>, Peter J. Munson<sup>2\*</sup>**

<sup>1</sup>The Framingham Heart Study, Framingham, MA, USA and the Division of Intramural Research, National Heart, Lung and Blood Institute, National Institutes of Health, Bethesda, MD, USA

<sup>2</sup>Mathematical and Statistical Computing Laboratory, Center for Information Technology, National Institutes of Health, Bethesda, MD, USA

<sup>3</sup>Institute for Aging Research, Hebrew SeniorLife, Harvard Medical School, Boston, MA, USA

<sup>4</sup>National Center for Biotechnology Information, National Library of Medicine, National Institutes of Health, Bethesda, MD, USA

<sup>5</sup>Department of Neurology, Boston University School of Medicine, Boston, MA, USA

<sup>6</sup>School of Public Health, Harvard University, Boston, MA, USA

<sup>7</sup>DNA Sequencing and Genomics Core, National Institutes of Health, Bethesda, MD, USA

<sup>8</sup>Department of Medicine, University of Massachusetts Medical School, Worcester, MA, USA

<sup>9</sup>National Institute on Aging, National Institutes of Health, Bethesda, MD, USA

<sup>10</sup>Department of Biostatistics, School of Public Health, Boston University, Boston, MA, USA

<sup>11</sup>Cardiology Section, Department of Medicine, Boston VA Healthcare, Boston, MA, USA

<sup>12</sup>Section of Biomedical Genetics, Department of Medicine, Boston University School of Medicine, Boston, MA, USA

\*Denotes equal contributions

**Fig. S1. Quantile-quantile plot of p-values for eQTL analysis.** Performed on 100,000 subsampled SNPs, with  $\lambda=0.9859$  and median of observed p-value = 0.50303. A total of 1,787,300,000 p-values are plotted.

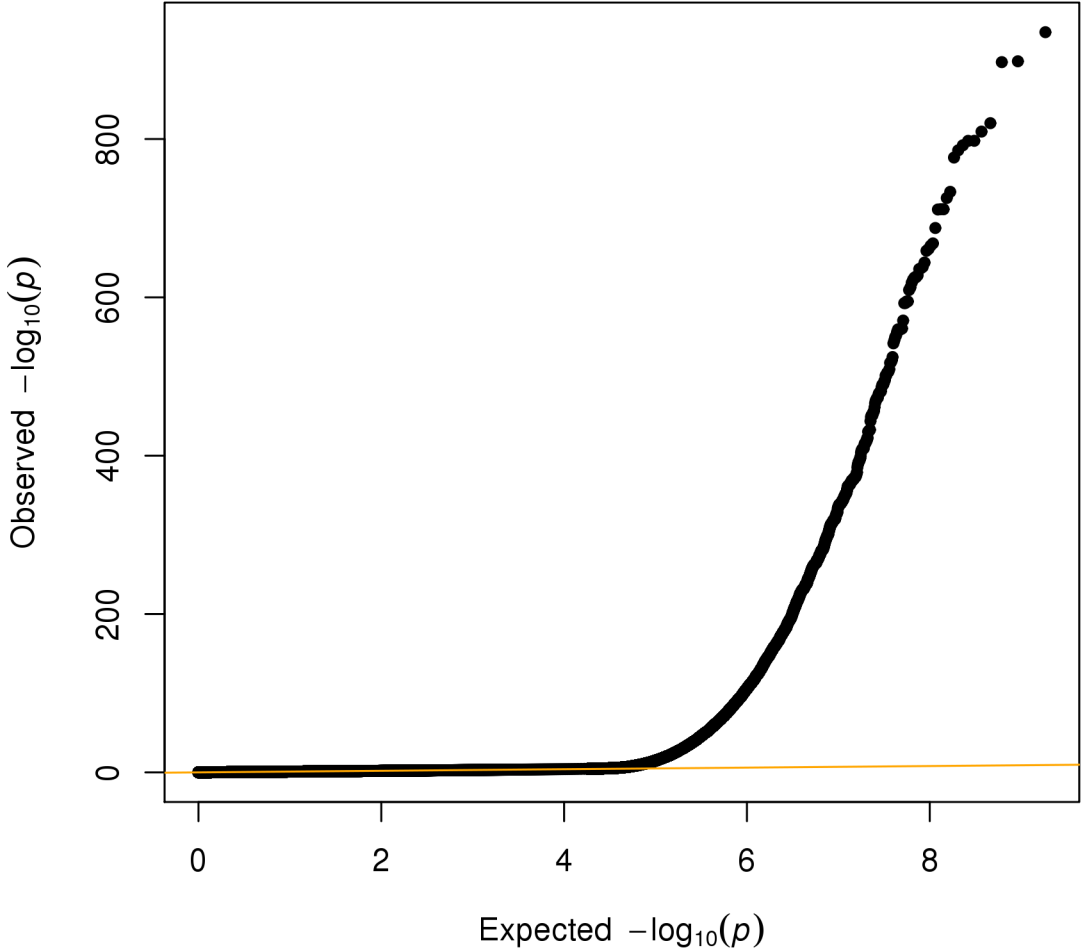

**Fig. S2. Example of SNP-in-Probe problem for Transcript Cluster 2617687 (XYLB).** A. Gene-level analysis showing lead variant (green) and three eQTLs which fall in certain probesets for this transcript cluster (black). One eQTL has  $R^2$  value within 90% of highest  $R^2$  for this transcript cluster (Green), indicating that this Transcript Cluster is candidate for SNP-in-probe problem. B. Exon-level analysis for 18 probesets within this transcript cluster. The SNPs falling into one of three probesets are indicated (black). One probeset, 2617715 includes eQTL (black) which is above 95% of best  $R^2$  for all probesets, it is a likely cause of a SNP-in-probe problem.

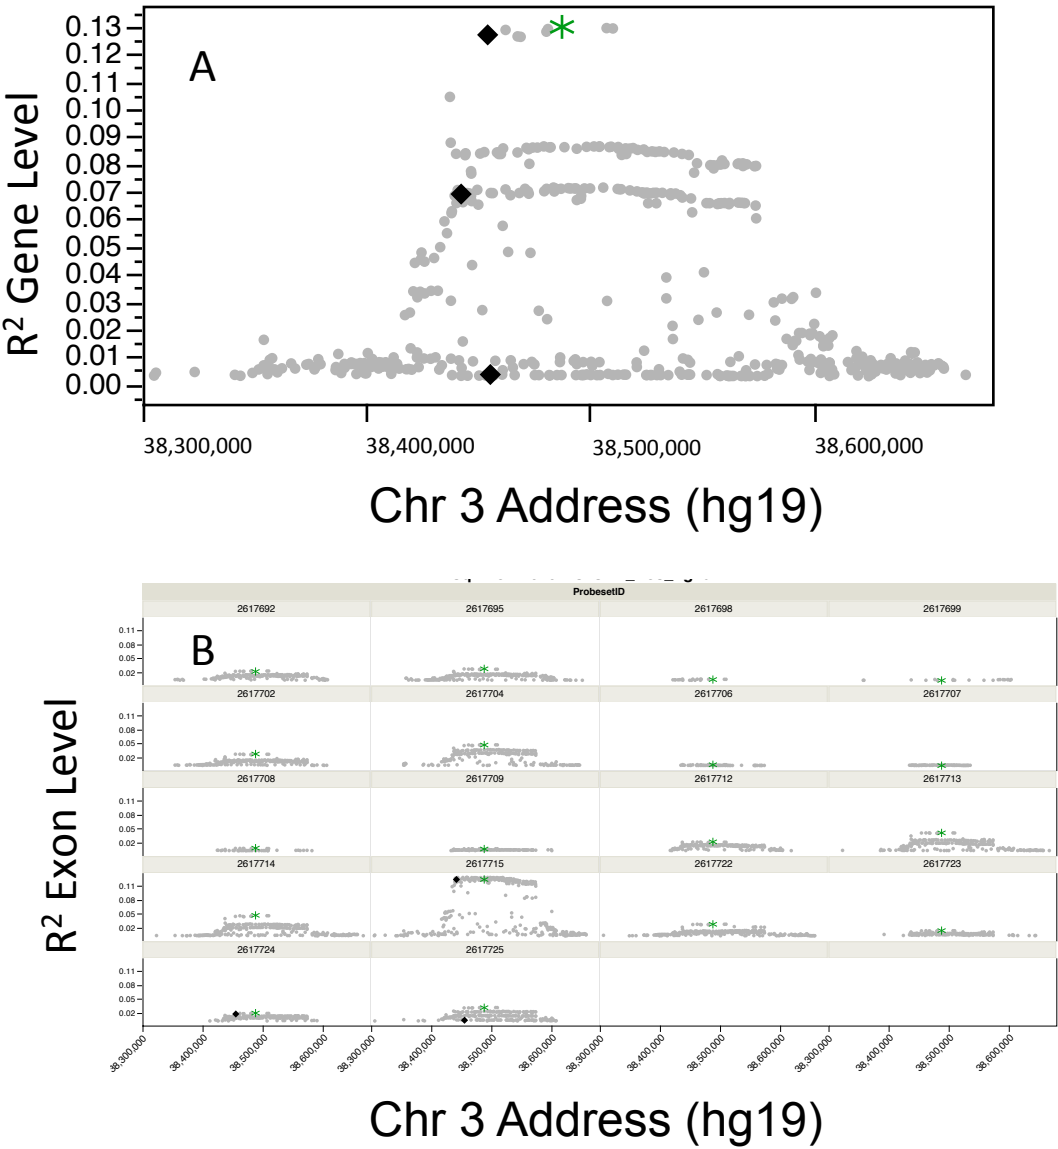

**Fig. S3. Dot plot for exon-level expression.** The bigger the bubble the smaller the FDR is. The smallest bubble indicates  $FDR < 1e-16$ . The largest bubble indicates  $FDR < 1e-300$ .

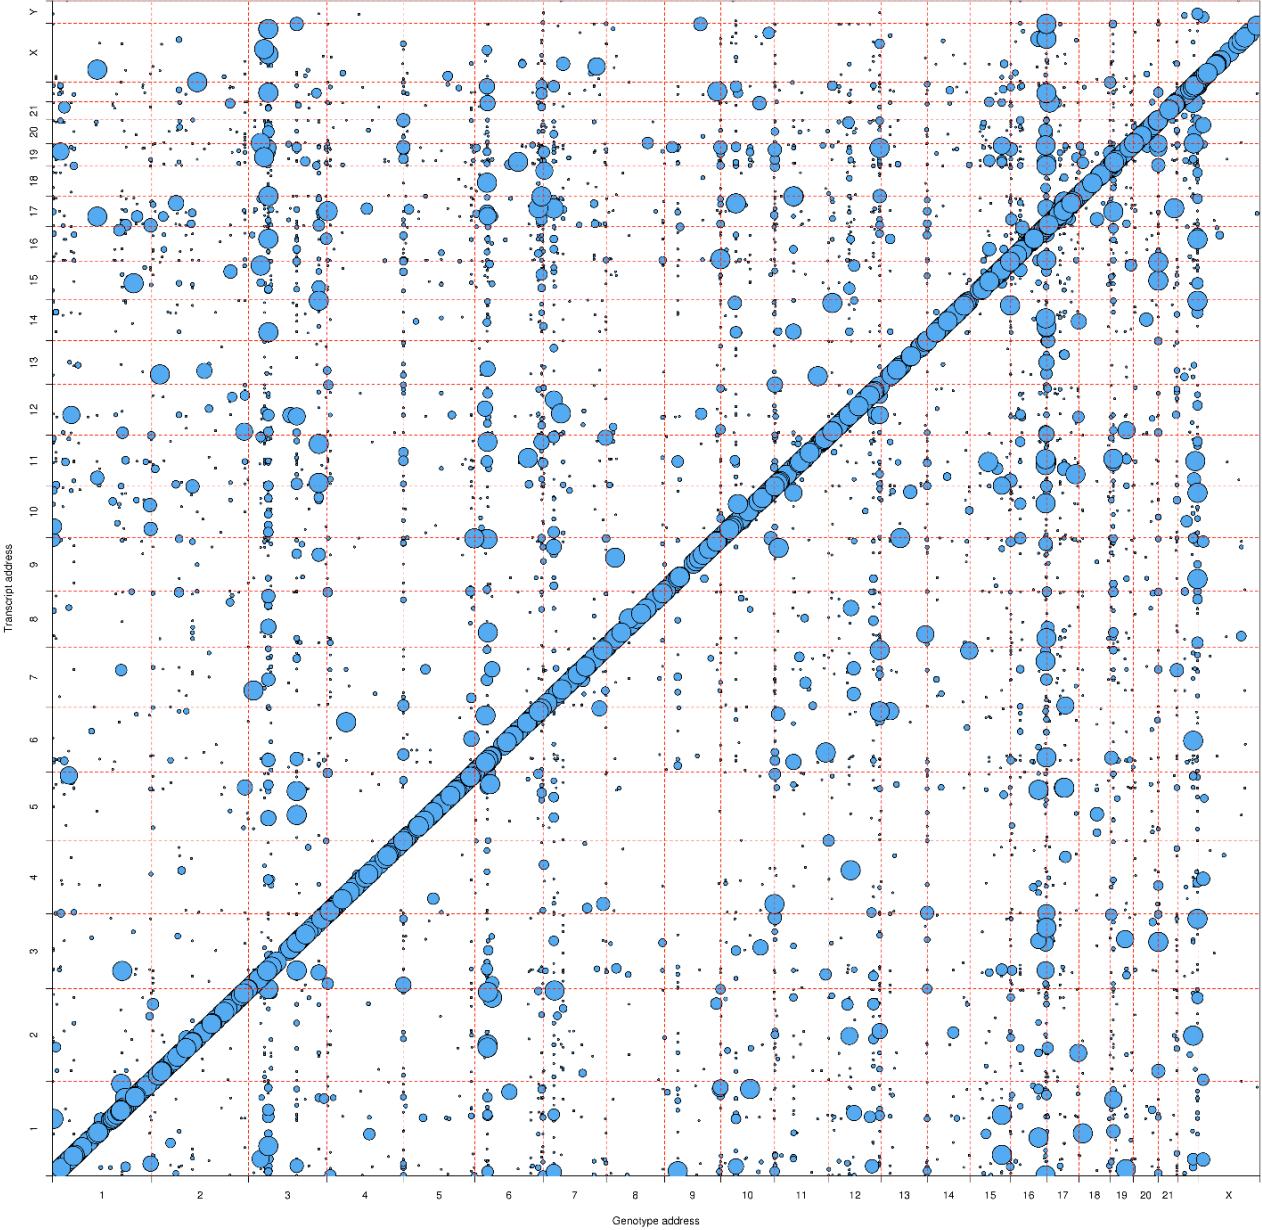

Fig. S4. Mean detection rate of cis-eGenes (represented by transcript cluster IDs, TCIDs) and mean detection rate of validated cis-eGenes vs Number of Probesets per TCID. The error bars show the 95% confidence interval of the mean. The mean detection rate (total, red or validated, blue) rises with number of probesets until about 21 to 25 probesets are available. Validation is counted in any of 5 external databases, for any SNP targeting this eGene. Bins indicate upper bound for number of probesets in bin. TCIDs with > 75 probesets included in last bin. A probeset consists generally of four 25 base probes on the Affy Exon array. A transcript cluster consists of from 1 to several hundred probesets.

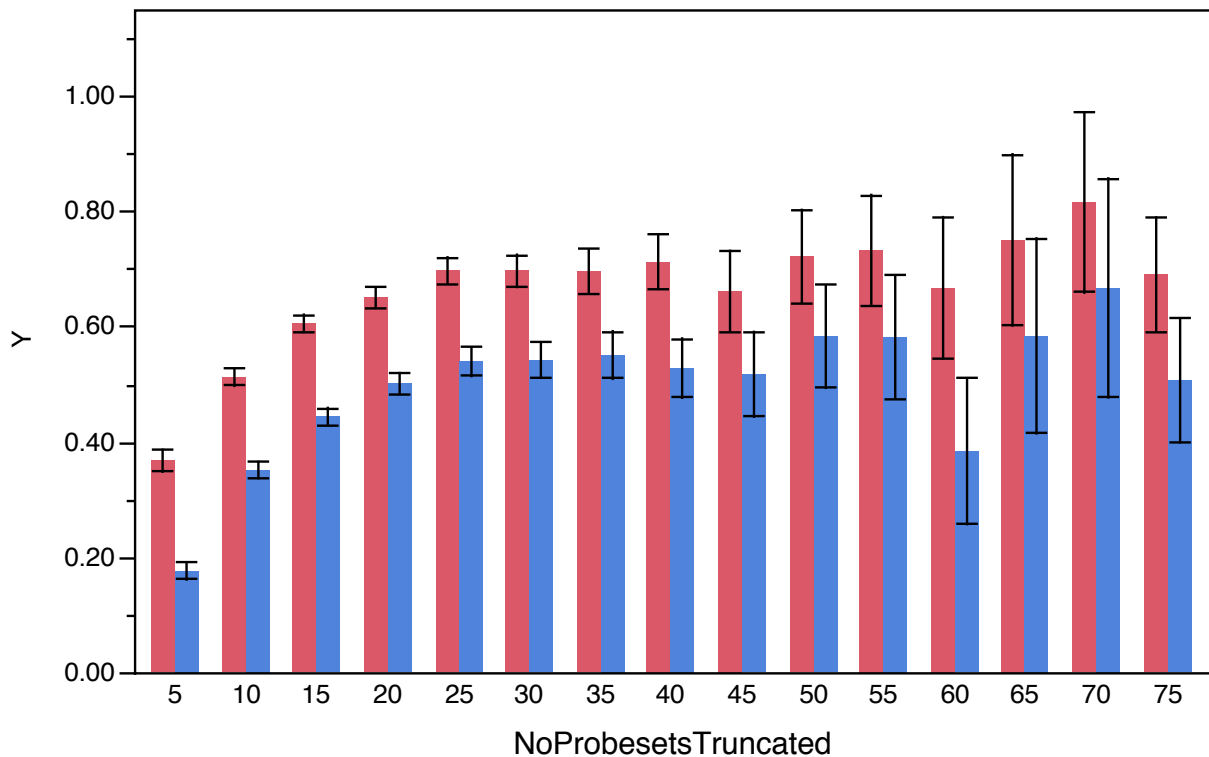

Fig. S5. Distribution of Primary Lead cis-eQTLs Relative to Transcription Start Site (TSS) and Transcription End Site (TES), by Transcript Length (A. Large,  $\geq 58$  Kb; B. Medium,  $\geq 18$  Kb and  $< 58$  Kb; C. Small,  $< 18$  Kb). Location of eQTL has been interpolated within [TSS, TES] interval, and weights suitably adjusted. Lead eQTLs exclude those with polymorphism-in-probe issues. 8,475 Transcript clusters are represented, having RefSeq annotations for TSS, TES.

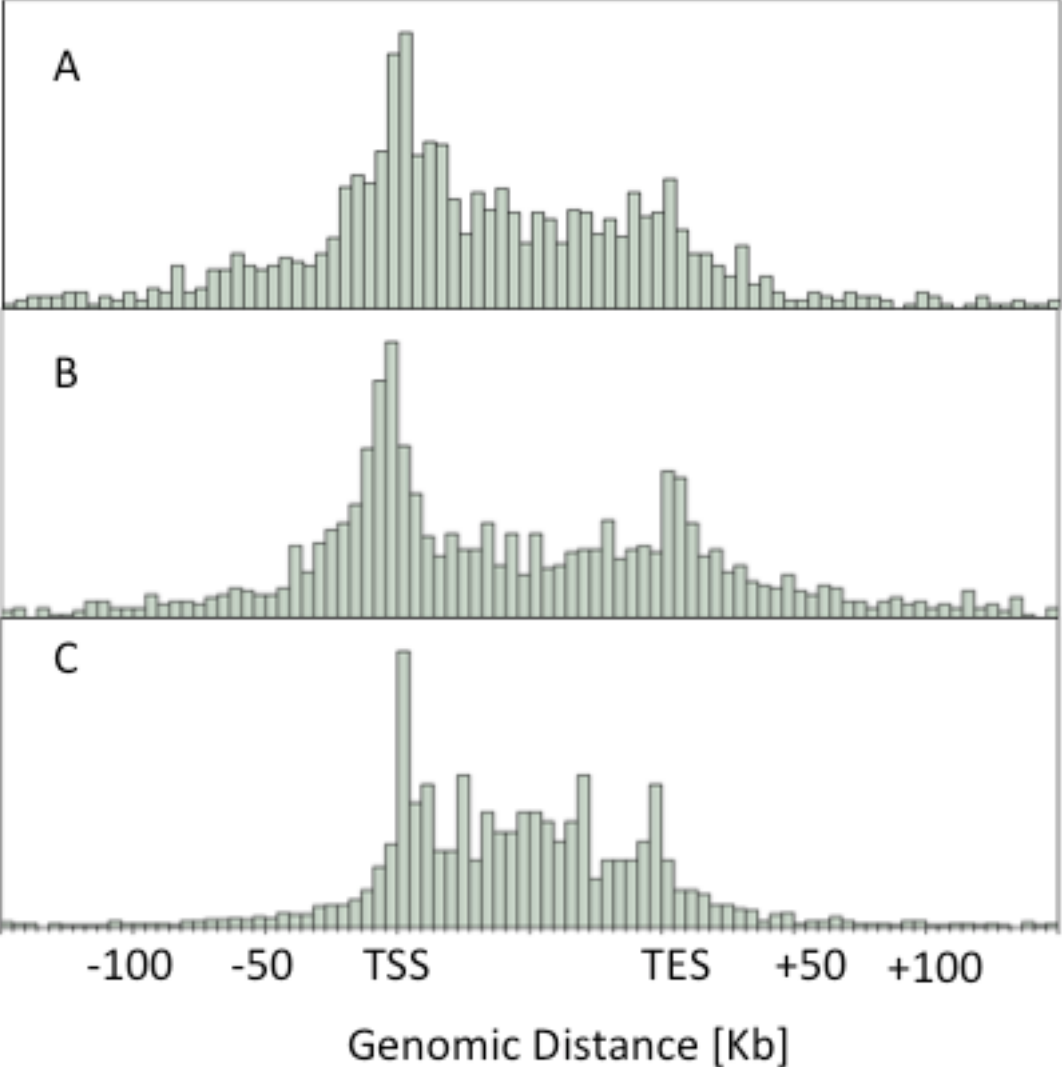

**Fig. S6. Number of targets and validated targets of extrachromosomal trans-eQTLs by chromosome.** A. Colors indicate trans-eQTLs with 6 or more targets, grouped into clusters and numbered as in Table 4. B. Number of validated targets for same eQTLs. Clusters 4, 6, 10, 11, 17, 18, 25, 29, 33, 34, 35, 38, 39, and 51 include one or more trans-eQTLs with validated targets. Clusters 6, 10 and 39 have validated targets for the strongest “lead variant” trans-eQTL.

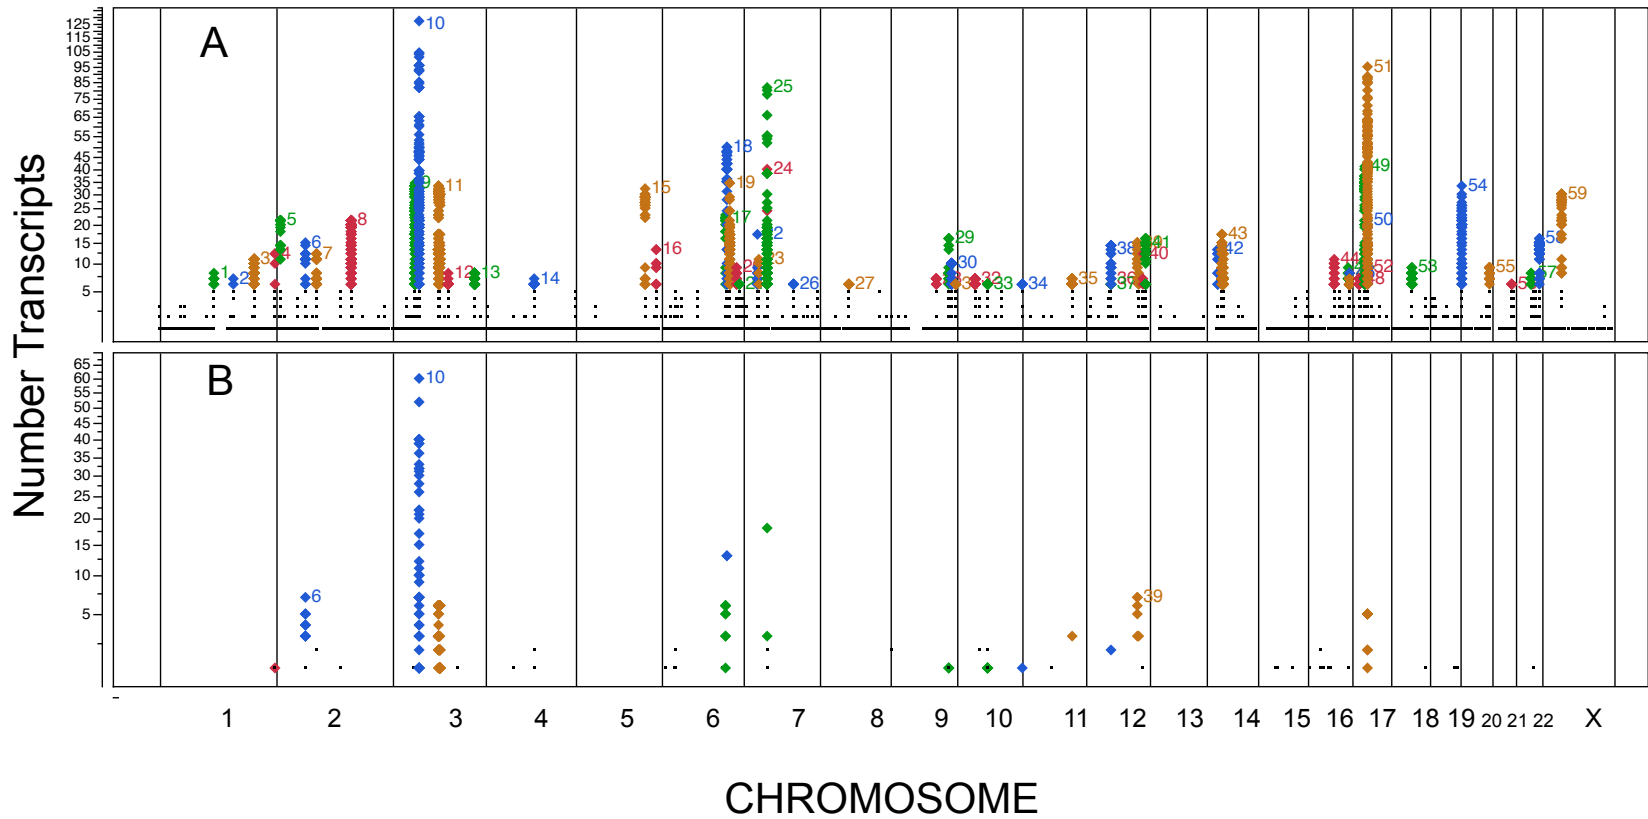

**Fig. S7. Principal component analysis of Framingham genetic data.** We performed a principal component (PC)<sup>1</sup> analysis with 521 unrelated FHS participants (Green) along with HapMap individuals (CEPH with Northern and Western European ancestry (CEU, Pink), Yoruba from Ibadan, Nigeria (YRI, Red), Han Chinese from Beijing (CHB, Blue) and Japanese from Tokyo (JPT, Blue). The samples which entered the eQTL study are shown in dark Green. Additional FHS participants were projected onto the first two PCs derived from that analysis (See Methods for details.)

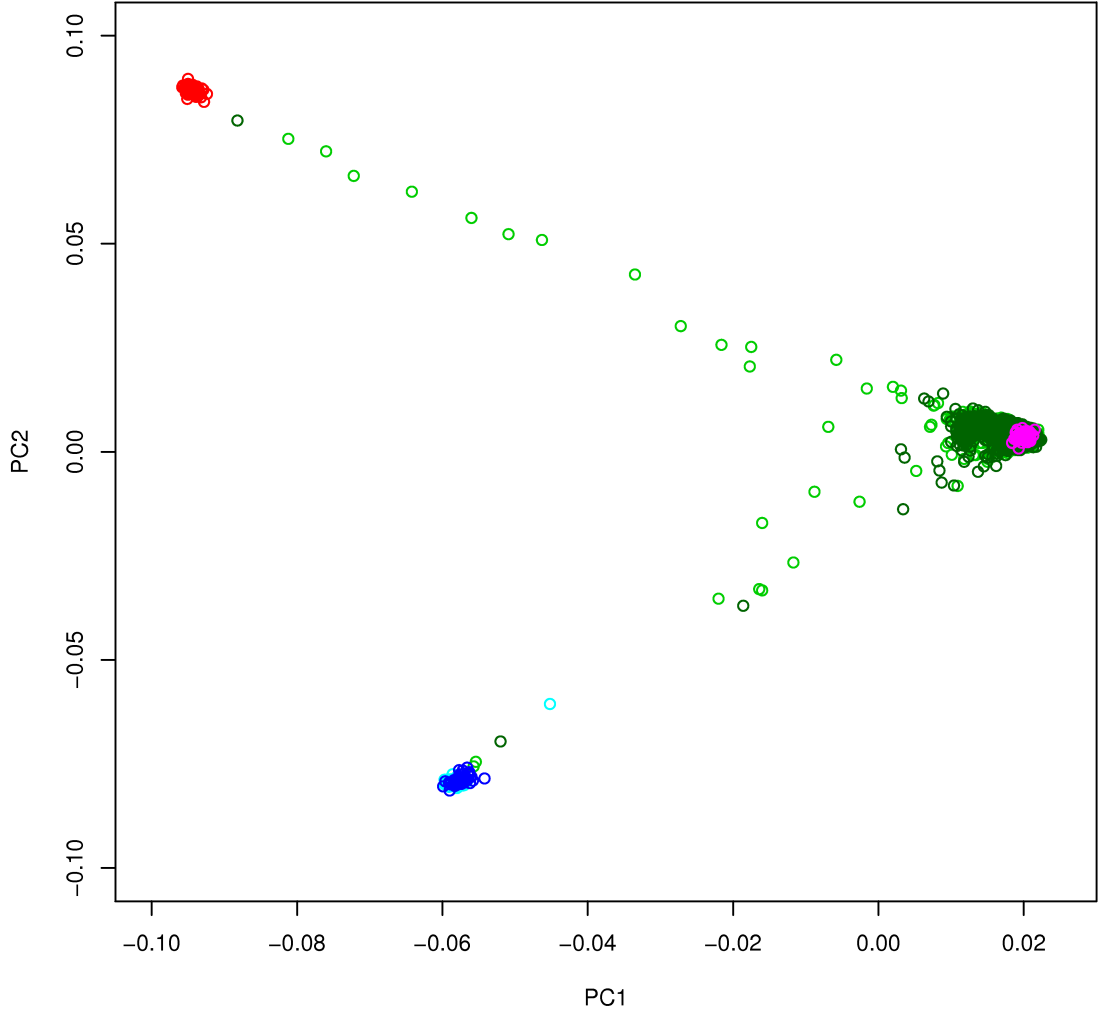



Fig. S8. Effect of Imputation RSq on Validation Rate. For eligible, HapMap cis-eQTLs, validation rate is the maximum of validation for any Transcript Cluster ID, for the Multiple Studies. Average validation rate is 0.69 is shown. 95% Confidence Intervals are shown.

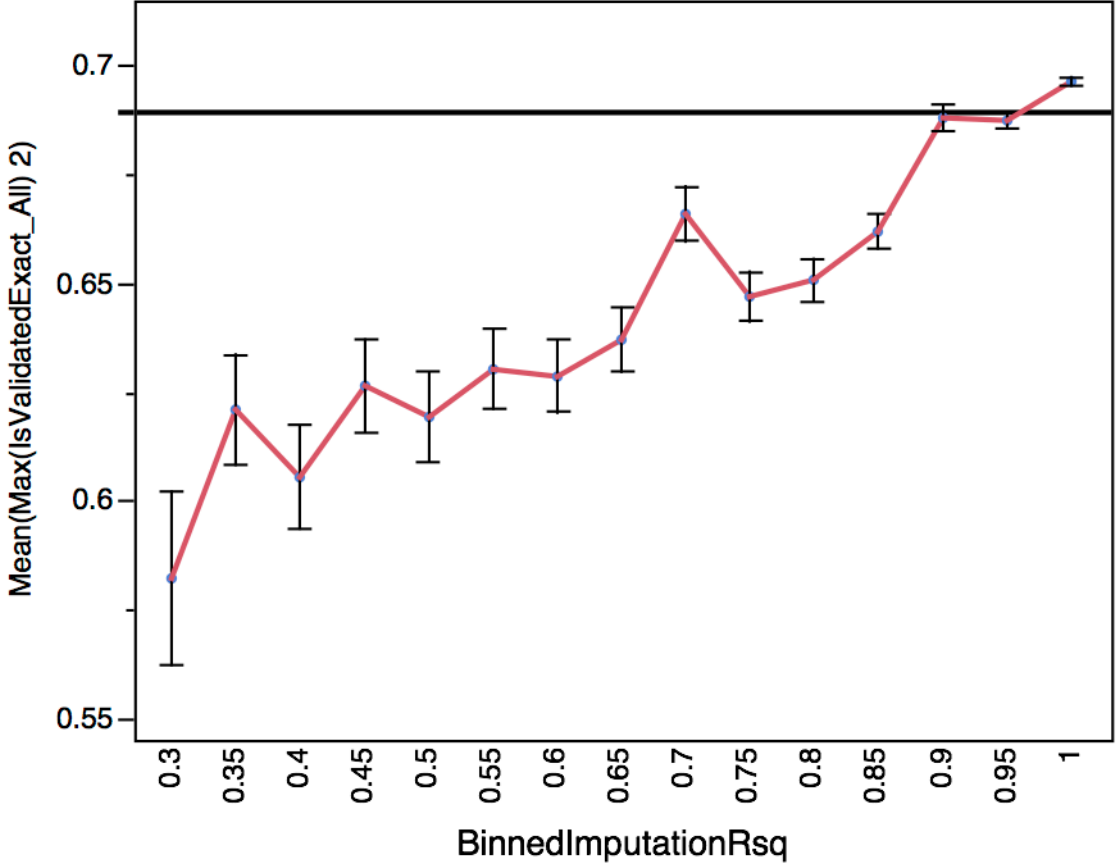

Fig. S9. Mean validation rate of cis-eGenes by Mean Expression Level. Mean expression level (RMA units) was binned. Relative validation rates, along with 95% confidence limits are shown. Validation rates (measured as number of eGenes validated in any of 5 studies for any cis-eQTL, divided by number of detected eGenes) is above the weighted average ratio when the expression level is above 5.

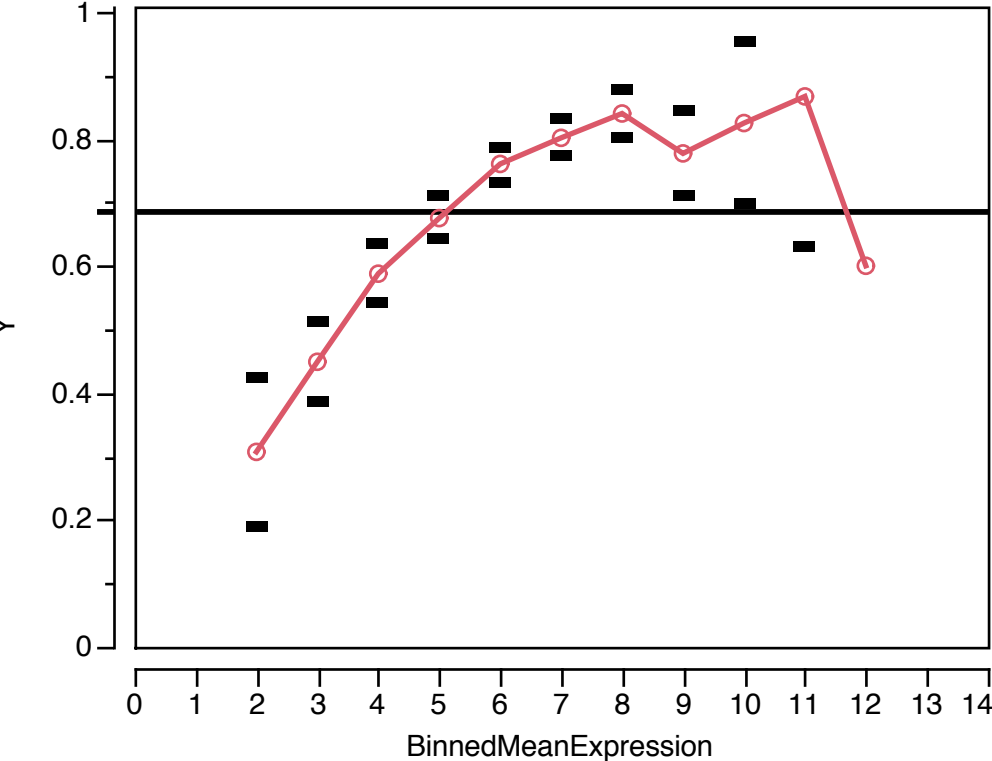

## Supplementary methods

### Polymorphism-in-probe

Sequence polymorphisms might conceivably affect the hybridization efficiency on the Affymetrix chip when the polymorphism appears within the designed probe sequence. If this situation is the main reason for the apparent significance of an eQTL-gene pair, we would expect that the significance would be close to maximal at the SNP which fell within the probe. Because of linkage-disequilibrium, nearby SNPs might also appear significant but to a lesser degree. Since we have both gene-level and exon-level results for each gene, we would also expect the polymorphism-in-probe signal would be strongest in the particular probeset containing that SNP and weaker or no-existent in other probesets. We constructed a rule to implement this expectation. Specifically, we downloaded the locations of Affymetrix core probes from UCSC Golden Path (<http://hgdownload.cse.ucsc.edu/goldenPath/hg19/database/>) in the file *affyExonProbeCore.txt.gz*. This file contained the hg19 address for 1,081,123 Probes comprising 283,927 Probesets and 18,693 Transcript Clusters. This file was joined with our file of 8,510,936 eligible SNPs ( $MAF \geq 0.01$ , Imputation quality  $R^2 \geq 0.3$ ) to yield a list of 44,015 Probes, (along with 27,543 corresponding Probesets and 12,032 corresponding Transcript Clusters) which contained one or more eligible SNPs, i.e. the candidates for a polymorphism in problems. Next, we summarized our gene-level results to compute for each gene, the ratio of the maximal  $R^2$  over the SNPs in a probe to that over every eligible SNP. We also summarized the corresponding exon-level results for each gene to obtain the ratio of  $R^2$  to the maximum  $R^2$  for that gene. If 1) the first, gene-level ratio was greater than 0.9 and 2) the second, exon-level ratio was greater than 0.95, we determined that the results for that transcript cluster were probably or likely due to the polymorphism-in-probe issue. The number of Transcript Clusters satisfying the first criterion was 1,822. The number which also satisfied the second criterion was 988 or 9.6% of the 10,327 detected eGenes. See illustrative example in Fig. S2.

There is a possibility that a cryptic polymorphism, not included in our set of 8.5 million, fell inside a probe, and had strong LD with a measured SNP outside the probe and thereby caused a false positive eQTL. This should be rare, since if a well-imputed ( $R^2 > 0.3$ ) polymorphism outside a probe is in strong LD with a cryptic polymorphism in probe, that polymorphism itself should also be well-imputed, and thus already accounted for in our procedure.

### Differential blood count imputation

Of the 5,257 samples, 2,181, from the third generation cohort had whole blood complete blood cell counts (CBCs, Beckman Coulter, Brea, California). The cell counts of the remaining samples were imputed using a Partial Least Square (PLS) prediction based on the gene expression data. We trained our model on two thirds of the 2,181 samples with CBC measurements, while reserving the other third as testing data. We used the expression values of all 17,873 genes in log 2 scale after normalized with the robust multi-chip average (RMA) method available in the Affymetrix Power Tools (APT)<sup>2</sup> Software version 1.12.0. The

training was performed in 10-fold validation fashion on the training dataset only, using the `pls` function of `pls` package<sup>3</sup> in R version 3.0.1, to predict 8 CBC components: red blood cell count (RBC), white blood cell count (WBC), platelet count, and percentages of neutrophil, lymphocyte, monocyte, eosinophil, and basophil. We selected the model giving the highest cross-validated  $R^2$  on the training dataset. The model was then applied to the test dataset, giving the following testing  $R^2$ : 0.61, 0.41, 0.25, 0.83, 0.83, 0.81, 0.89, and 0.25, for RBC, WBC, platelet count, and percentages of neutrophil, lymphocyte, monocyte, eosinophil, and basophil, respectively. We then applied the selected model to the remaining samples that do not have CBC measurements. We conducted comparisons between results of using imputed cell counts and that of using measured ones and did not find substantial difference. Thus, we used measured cell counts when available and imputed ones when not.

### Validation analysis details

For Multiple Studies<sup>4-8</sup>, we performed probeset address overlap analysis between Affymetrix HuEx and the other platforms to ensure that the probes or transcripts are measuring some common part of the gene. We did not perform gene symbol-based matching because two transcriptome platforms may measure different parts of the gene. Rather, to ensure the accuracy of the transcript annotation, we downloaded manufacturer's latest annotation files: for Affymetrix Human Exon ST 1.0 (HuEx), we used `HuEx-1_0-st-v2-na33.1.hg19.probeset.csv` and `HuEx-1_0-st-v2-na33.1.hg19.transcript.csv`; for Affymetrix Human Genome U133 Plus 2, we used `HG-U133_Plus_2.na33.annot.csv`; for Illumina HumanHT12, we used `HumanHT-12_V3_0_R3_11283641_a.zip` (for v3) and `HumanHT-12_V4_0_R2_15002873_b.zip` (for v4). Since Illumina annotation files contain only hg18 coordinates, we performed translation to hg19 using the command line `liftOver` tool. Probes with addresses that did not translate were discarded. Affymetrix annotation files are already in hg19 coordinates. The annotation columns of published datasets using older coordinate system were then replaced with the new ones, unless when there is no information on the newer annotation files. In the latter case, we assumed that the authors of the published datasets obtained additional annotations elsewhere. We included only probesets that were measured in at least one of the external databases. We also required the SNP RS ID or the SNP genomic address to match exactly and that the probes of the transcript overlap. To ensure the accuracy of matching SNPs, we used dbSNP version 137 and updated all the SNP addresses accordingly (in hg19 coordinates). For SNPs that did not have an rs ID number in dbSNP, but only an hg18 addresses, we performed `liftOver` translation to hg19 coordinates. We also did not consider linkage disequilibrium for proxy SNPs. Because only one of the external dataset used imputation to the 1000G SNP set while the rest used HapMap SNPs, we limited the validation efforts to HapMap version 3 SNPs only.

For Battle et al<sup>7</sup>, we found eligible SNPs those appearing on both the Illumina HumanOmni1-Quad\_v1 BeadChip (which interrogated 1,124,584 SNPs) and the list of 8,502,797 SNPs analyzed by FHS, resulting in 800,134 SNPs. We did not have access to SNP quality data, so no doubt this number is an over-estimate. Since Battle, et al<sup>7</sup> used RNA-Seq instead of microarray for determining expression, we determined the eligible transcripts

by finding the common transcripts defined by both the NCBI v37.2 *H. sapiens* reference genome (25,962 transcripts) and the Affymetrix na33.1 annotations of the HuEx-1\_0-st chip (17,471 transcripts). We found 15,596 transcripts to be eligible for validation.

## References

1. Price AL, Butler J, Patterson N, Capelli C, Pascali VL, Scarnicci F, et al. Discerning the ancestry of European Americans in genetic association studies. *PLoS Genet.* 2008;4:e236.
2. Affymetrix. Affymetrix Power Tools [Internet]. Affymetrix; Available from: [http://www.affymetrix.com/partners\\_programs/programs/developer/tools/powertools.affx](http://www.affymetrix.com/partners_programs/programs/developer/tools/powertools.affx)
3. Mevik B, Wehrens R. The pls package: principal component and partial least squares regression in R. *J Stat Soft.* 2007;18:1–24.
4. ENCODE Project Consortium. An integrated encyclopedia of DNA elements in the human genome. *Nature.* 2012;489:57–74.
5. Westra H-J, Peters MJ, Esko T, Yaghootkar H, Schurmann C, Kettunen J, et al. Systematic identification of trans eQTLs as putative drivers of known disease associations. *Nat Genet.* 2013;45:1238–1243.
6. Liang L, Morar N, Dixon AL, Lathrop GM, Abecasis GR, Moffatt MF, et al. A cross-platform analysis of 14,177 expression quantitative trait loci derived from lymphoblastoid cell lines. *Genome Research.* 2013;23:716–726.
7. Battle A, Montgomery SB. Determining causality and consequence of expression quantitative trait loci. *Hum Genet.* 2014;133:727–735.
8. Kirsten H, Al-Hasani H, Holdt L, Gross A, Beutner F, Krohn K, et al. Dissecting the genetics of the human transcriptome identifies novel trait-related trans-eQTLs and corroborates the regulatory relevance of non-protein coding loci†. *Hum Mol Genet.* 2015;24:4746–4763.
9. Stegle O, Parts L, Durbin R, Winn J. A bayesian framework to account for complex non-genetic factors in gene expression levels greatly increases power in eQTL studies. *PLoS Computational Biology.* 2010;6:e1000770.
10. Leek JT, Storey JD. Capturing heterogeneity in gene expression studies by surrogate variable analysis. *PLoS Genetics.* 2007;3:e161.
11. Nikpay M, Goel A, Won H-H, Hall LM, Willenborg C, Kanoni S, et al. A comprehensive 1,000 Genomes-based genome-wide association meta-analysis of coronary artery disease. *Nat Genet.* 2015;47:1121–1130.

12. Schunkert H, König IR, Kathiresan S, Reilly MP, Assimes TL, Holm H, et al. Large-scale association analysis identifies 13 new susceptibility loci for coronary artery disease. *Nat Genet.* 2011;43:333–338.
13. CARDIoGRAMplusC4D Consortium, Deloukas P, Kanoni S, Willenborg C, Farrall M, Assimes TL, et al. Large-scale association analysis identifies new risk loci for coronary artery disease. *Nat Genet.* 2013;45:25–33.
14. Huan T, Esko T, Peters MJ, Pilling LC, Schramm K, Schurmann C, et al. A meta-analysis of gene expression signatures of blood pressure and hypertension. *PLoS Genet.* 2015;11:e1005035.

**Table S1. Effect of reducing sample size on detection rates of eQTL-Transcript Pairs, Independent eQTLs or eGenes.**

| Cohort    | Cohort Size |      | SNP:Transcript Pairs |      | Independent Lead eQTLs |      | Unique eGenes |      | Lead eQTLs per eGene |
|-----------|-------------|------|----------------------|------|------------------------|------|---------------|------|----------------------|
|           |             |      | Cis                  |      |                        |      |               |      |                      |
| Full      | 5,257       | 100% | 4,285,456            | 100% | 19,239                 | 100% | 10,327        | 100% | 1.86                 |
| Offspring | 2,240       | 43%  | 1,846,181            | 42%  | 10,623                 | 55%  | 6,289         | 61%  | 1.69                 |
| Gen3      | 3,017       | 57%  | 2,162,746            | 49%  | 11,904                 | 62%  | 6,850         | 66%  | 1.74                 |
|           |             |      | Trans                |      |                        |      |               |      |                      |
| Full      | 5,257       | 100% | 216,169              | 100% | 5,749                  | 100% | 4,958         | 100% | 1.15                 |
| Off       | 2,240       | 43%  | 78,128               | 46%  | 813                    | 14%  | 854           | 17%  | 0.95                 |
| Gen3      | 3,017       | 57%  | 115,289              | 63%  | 1,482                  | 26%  | 1,531         | 31%  | 0.97                 |

**Table S2. Number of eQTL-Gene or eQTL-Exon pairs and Internal Validation rates**

|                 | Cis/Trans** | Technical covariate adjustment only | 20 PEER factors <sup>9</sup> on unadjusted data | 20 PEER factors on adjusted data* | 40 Principal Components on unadjusted data | 40 Surrogate Variables <sup>10</sup> on unadjusted data |
|-----------------|-------------|-------------------------------------|-------------------------------------------------|-----------------------------------|--------------------------------------------|---------------------------------------------------------|
| Gene-Level      |             |                                     |                                                 |                                   |                                            |                                                         |
| Offspring       | Cis         | 1,352,644                           | 1,675,618                                       | 1,729,786                         | 1,795,863                                  | 1,463,999                                               |
|                 | Trans       | 275,434                             | 435,880                                         | 341,450                           | 462,351                                    | 512,512                                                 |
| Generation 3    | Cis         | 1,606,135                           | 2,087,220                                       | 2,010,813                         | 2,207,789                                  | 1,892,934                                               |
|                 | Trans       | 301,154                             | 667,565                                         | 381,382                           | 658,834                                    | 618,443                                                 |
| Overlap         | Cis         | 1,172,959                           | 1,478,934                                       | 1,503,063                         | 1,580,763                                  | 1,293,493                                               |
|                 | Trans       | 126,724                             | 174,566                                         | 156,874                           | 157,002                                    | 148,860                                                 |
| Validation rate | Cis         | 73.03%                              | 70.86%                                          | 74.75%                            | 71.60%                                     | 68.33%                                                  |
|                 | Trans       | 42.08%                              | 26.15%                                          | 41.13%                            | 23.83%                                     | 24.07%                                                  |
| Exon-Level      |             |                                     |                                                 |                                   |                                            |                                                         |
| Offspring       | Cis         | -                                   | -                                               | 19,843,026                        | -                                          | -                                                       |
|                 | Trans       | -                                   | -                                               | 2,671,798                         | -                                          | -                                                       |
| Generation 3    | Cis         | -                                   | -                                               | 22,503,147                        | -                                          | -                                                       |
|                 | Trans       | -                                   | -                                               | 3,325,594                         | -                                          | -                                                       |
| Overlap         | Cis         | -                                   | -                                               | 15,789,096                        | -                                          | -                                                       |
|                 | Trans       | -                                   | -                                               | 2,040,249                         | -                                          | -                                                       |
| Validation rate | Cis         | -                                   | -                                               | 70.16%                            | -                                          | -                                                       |
|                 | Trans       | -                                   | -                                               | 61.34%                            | -                                          | -                                                       |

\*Chosen method, based on Gene-level results and also used for Exon-level results. Validation Rate is Overlap divided by Generation 3.

\*\*Method of defining cis/trans used here differs from that used in rest of paper. Here, cis-eQTL means transcript start as defined genomically in Affymetrix annotation is within 1 Mb of eQTL.



**Table S3. Top 25 Exon-level lead cis and top 25 Exon-level lead trans Probeset-eQTL pairs.**

| Marker Position       | Rs_ID      | Transcript Cluster ID | Probeset ID | Trans Chr | Gene Symbol               | R <sup>2</sup> | Beta     | Cluster Number |
|-----------------------|------------|-----------------------|-------------|-----------|---------------------------|----------------|----------|----------------|
| Top Cis-eQTL pairs    |            |                       |             |           |                           |                |          |                |
| 12:10118747           | rs12231872 | 3404530               | 3404536     | 12        | <i>CLEC12A</i>            | 56%            | -0.22[G] |                |
| X:24086687            | rs7882734  | 3971877               | 3971879     | X         | <i>EIF2S3</i>             | 54%            | 0.15[G]  |                |
| 6:32576341            | rs9271093  | 4048241               | 4048242     | 6         | <i>HLA-DRB5</i>           | 53%            | -0.39[A] |                |
| 15:48596713           | rs74011998 | 3593065               | 3593088     | 15        | <i>SLC12A1</i>            | 53%            | -0.37[T] |                |
| 6:32576341            | rs9271093  | 4048265               | 4048279     | 6         | <i>HLA-DRB1</i>           | 52%            | -1.02[A] |                |
| 20:1552430            | rs2253427  | 3894727               | 3894744     | 20        | <i>SIRPB1</i>             | 51%            | -0.61[C] |                |
| 12:56435929           | rs1131017  | 3417240               | 3417244     | 12        |                           | 51%            | -0.20[G] |                |
| 5:171533782           | rs2306961  | 2887048               | 2887089     | 5         | <i>STK10</i>              | 50%            | 0.22[T]  |                |
| 17:44793503           | rs199439   | 3760268               | 3760285     | 17        | <i>ARL17A</i>             | 49%            | -0.33[A] |                |
| 1:207280764           | rs12063500 | 2377165               | 2377174     | 1         | <i>C4BPA</i>              | 49%            | -0.78[C] |                |
| 5:118811533           | rs25640    | 2825733               | 2825744     | 5         | <i>HSD17B4</i>            | 48%            | -0.14[G] |                |
| 1:155209360           | rs2075569  | 2437205               | 2437227     | 1         | <i>GBAP1</i>              | 47%            | -0.20[T] |                |
| 19:36230174           | rs12459634 | 3859899               | 3859901     | 19        | <i>IGFLR1</i>             | 47%            | 0.24[T]  |                |
| 17:45438886:<br>CAGTG |            | 3724591               | 3724617     | 17        | <i>C17orf57</i>           | 47%            | 0.34[R]  |                |
| 7:150476888           | rs7806458  | 3079172               | 3079179     | 7         | <i>TMEM176B</i>           | 47%            | -0.26[A] |                |
| 8:100896323           | rs7812991  | 3146433               | 3146443     | 8         | <i>COX6C</i>              | 47%            | -0.20[G] |                |
| X:109206541           | rs2499412  | 3987029               | 3987102     | X         | <i>TMEM164</i>            | 47%            | 0.20[G]  |                |
| 4:6697822             | rs3822260  | 2717078               | 2717088     | 4         | <i>S100P</i>              | 46%            | 0.29[C]  |                |
| 7:150442551           | rs10271868 | 3031573               | 3031599     | 7         | <i>GIMAP1-<br/>GIMAP5</i> | 46%            | 0.25[T]  |                |
| 9:132588337           | rs7470675  | 3227121               | 3227132     | 9         | <i>C9orf78</i>            | 46%            | 0.18[T]  |                |
| 5:96252589            | rs2910686  | 2821347               | 2821382     | 5         | <i>ERAP2</i>              | 45%            | -0.24[T] |                |
| 4:10099030            | rs3822237  | 2760371               | 2760413     | 4         | <i>WDR1</i>               | 45%            | -0.17[A] |                |
| 22:42498204           | rs12157818 | 3947310               | 3947316     | 22        | <i>C22orf32</i>           | 45%            | 0.24[C]  |                |
| 6:26392515            | rs2072803  | 2899333               | 2899339     | 6         | <i>BTN3A2</i>             | 45%            | 0.35[G]  |                |
| 5:180375312           | rs2921513  | 2844888               | 2844903     | 5         | <i>BTNL3</i>              | 45%            | -0.60[T] |                |

| Marker Position      | Rs_ID       | Transcript Cluster ID | Probeset ID | Trans Chr | Gene Symbol      | R <sup>2</sup> | Beta     | Cluster Number |
|----------------------|-------------|-----------------------|-------------|-----------|------------------|----------------|----------|----------------|
| Top Trans-eQTL pairs |             |                       |             |           |                  |                |          |                |
| 12:56435929          | rs1131017   | 2782504               | 2782509     | 4         |                  | 51%            | -0.17[G] |                |
| 20:62551785:GC_G     |             | 3610982               | 3610999     | 15        | <i>SYNM</i>      | 47%            | -0.19[R] | 55             |
| 16:69974448          | rs3748388   | 2876543               | 2876551     | 5         | <i>TIFAB</i>     | 47%            | -0.35[A] |                |
| 3:176912899          | rs12493005  | 3554360               | 3554361     | 14        | <i>ADSSL1</i>    | 47%            | 0.19[C]  | 13             |
| 22:39131727          | rs1043312   | 2572909               | 2572930     | 2         | <i>EN1</i>       | 45%            | -0.34[T] |                |
| 20:62551785:GC_G     |             | 3623751               | 3623769     | 15        | <i>USP50</i>     | 45%            | -0.27[R] | 55             |
| 17:44793503          | rs199439    | 2878461               | 2878467     | 5         | <i>WDR55</i>     | 45%            | -0.16[A] |                |
| 3:39456928           | rs13082342  | 4014387               | 4014399     | X         | <i>RPSA</i>      | 45%            | 0.12[T]  |                |
| 3:50039474           | rs7628058   | 3939154               | 3939164     | 22        | <i>RAB36</i>     | 45%            | 0.43[G]  | 9              |
| 3:39456928           | rs13082342  | 3827218               | 3827234     | 19        | <i>RPSAP58</i>   | 45%            | 0.12[T]  |                |
| 15:31157666          | rs12439909  | 3614901               | 3614938     | 15        | <i>HERC2</i>     | 43%            | -0.21[A] |                |
| 3:176912899          | rs12493005  | 3391029               | 3391052     | 11        | <i>PPP2R1B</i>   | 43%            | 0.15[C]  | 13             |
| 3:50039474           | rs7628058   | 3981931               | 3981932     | X         | <i>ZCCHC13</i>   | 43%            | 0.42[G]  | 9              |
| 3:50037940           | rs6767381   | 4024310               | 4024313     | X         | <i>SOX3</i>      | 42%            | 0.20[A]  | 9              |
| 1:182350107          | rs10429835  | 2376168               | 2376195     | 1         | <i>NFASC</i>     | 42%            | 0.33[A]  |                |
| 8:56977485           | rs2953922   | 3103494               | 3103514     | 8         | <i>TMEM70</i>    | 42%            | 0.27[G]  |                |
| 16:87764267          | rs9934565   | 2391425               | 2391451     | 1         | <i>DVL1</i>      | 41%            | -0.22[A] | 45             |
| 10:43310305          | rs11239784  | 3256221               | 3256230     | 10        | <i>AGAP11</i>    | 41%            | 0.22[G]  |                |
| 16:87764267          | rs9934565   | 3257031               | 3257071     | 10        | <i>STAMBPL1</i>  | 40%            | -0.21[A] | 45             |
| 3:50037123           | rs3774733   | 3693591               | 3693605     | 16        | <i>PRSS54</i>    | 40%            | 0.22[C]  | 9              |
| 2:114453472:A_AT     | rs145131572 | 3951136               | 3951147     | 22        | <i>RPL23AP82</i> | 39%            | -0.25[R] |                |
| 22:50036897          | rs5770610   | 3948590               | 3948607     | 22        | <i>RIBC2</i>     | 39%            | 0.38[A]  | 58             |
| 22:40603580          | rs6001837   | 3873389               | 3873392     | 20        | <i>PSMF1</i>     | 39%            | -0.41[A] |                |
| 5:179036268          | rs60104959  | 3194470               | 3194557     | 9         | <i>EGFL7</i>     | 38%            | -0.27[A] |                |
| 15:80126245          | rs4779162   | 2440117               | 2440129     | 1         | <i>PEX19</i>     | 38%            | 0.28[T]  |                |

$R^2$  - Percentage Variance Explained

Marker position is annotated as chromosome number:location in hg19 coordinate

Beta is regression estimate (log base 2 expression difference per dosage of minor allele), with minor allele in brackets. [R] refers to the reference allele for an indel polymorphism

**Table S4. Enrichment of Primary or Secondary Lead cis-eQTLs by Functional Region.**

| Functional Region  | Enrichment        | Obs. | Exp.   | Log10 Pvalue | Enrichment          | Obs. | Exp.   | Log10 Pvalue |
|--------------------|-------------------|------|--------|--------------|---------------------|------|--------|--------------|
|                    | Primary Lead eQTL |      |        |              | Secondary Lead eQTL |      |        |              |
| Intergenic Up      | <b>0.8</b>        | 3198 | 4235.0 | -113         | <b>0.8</b>          | 3092 | 3799.3 | -59          |
| Transcribed Region | <b>9.4</b>        | 2951 | 312.3  | <-280        | <b>7.2</b>          | 2274 | 314.2  | <-280        |
| Intergenic Down    | <b>0.6</b>        | 2339 | 3940.7 | -279         | <b>0.6</b>          | 2253 | 3505.5 | -190         |
| 5'- UTR            | <b>45.0</b>       | 108  | 2.4    | -140         | <b>29.7</b>         | 65   | 2.2    | -73          |
| All Exons          | <b>25.4</b>       | 406  | 16.0   | <-280        | <b>17.7</b>         | 266  | 15.0   | -235         |
| First Exon         | <b>44.6</b>       | 138  | 3.1    | -178         | <b>26.4</b>         | 72   | 2.7    | -77          |
| Other Exons        | <b>20.8</b>       | 268  | 12.9   | -251         | <b>15.8</b>         | 194  | 12.3   | -161         |
| All Introns        | <b>8.6</b>        | 2545 | 296.3  | <-280        | <b>6.7</b>          | 2008 | 299.2  | <-280        |
| First Intron       | <b>10.9</b>       | 822  | 75.6   | <-280        | <b>8.3</b>          | 621  | 74.8   | <-280        |
| Other Introns      | <b>7.8</b>        | 1723 | 220.7  | <-280        | <b>6.2</b>          | 1387 | 224.4  | <-280        |
| 3'- UTR            | <b>19.7</b>       | 151  | 7.7    | -138         | <b>13.0</b>         | 98   | 7.6    | -73          |

Enrichment = Observed/Expected frequency. Primary Lead eQTL analysis based on 8,475 transcripts (TCIDs). Secondary Lead eQTL analysis based on 4,188 TCIDs with one or more secondary lead eQTLs. All transcripts with potential Polymorphism-in-Probe issues were excluded. For each TCID, we consider a pruned subset of SNPs having low mutual LD (see Methods) falling in 2 Mb region centered on transcription start site. Each SNP is either in or not in the Functional Region, and is or is not a Lead eQTL, forming a 2 by 2 table, which is then summarized over all TCIDs. P-values are determined using Fisher's exact test.

**Table S5. Enrichment of lead eQTLs with strong evidence as regulatory positions.**

| RegulomeDB Evidence Scores | Primary and Secondary Lead eQTLs (expected) | Primary Lead eQTL only (expected) | SNPs with RegulomeDB Scores | Non-Significant SNPs |
|----------------------------|---------------------------------------------|-----------------------------------|-----------------------------|----------------------|
| Cis-eQTLs                  |                                             |                                   |                             |                      |
| Strong (1a & 2a)           | 121(18)                                     | 70(9)                             | 14,236                      | 8,344                |
| None (6 & 7)               | 8,035                                       | 4,118                             | 4,903,615                   | 3,766,681            |
| Enrichment                 | 6.7                                         | 7.7                               |                             |                      |
| Log10 pvalue               | -89.59                                      | -69.47                            |                             |                      |
| Trans-eQTLs                |                                             |                                   |                             |                      |
| Strong (1a & 2a)           | 17(8)                                       | 16(8)                             | 14,417                      | 14,170               |
| None (6 & 7)               | 3,077                                       | 2,968                             | 5,336,743                   | 5,294,488            |
| Enrichment                 | 2.1                                         | 2.0                               |                             |                      |
| Log10 pvalue               | -2.3                                        | -2.1                              |                             |                      |

- RegulomeDB Scores 1a&2a = TF binding & matched TF motif & matched DNase Footprint & DNase peak
- Enrichment (observed/expected) compares All and Primary Lead eQTLs with non-Significant eQTLs
- Log10 of Pearson Chi-Square p-value, with adjustment for LD in non-Significant SNPs
- All lead eQTLs targeting genes with potential polymorphism-in-probe have been excluded here.

**Table S6. Platelet-related clusters**

| Cluster No. | Top GSEA FDR* | Contains platelet GWAS SNPs |
|-------------|---------------|-----------------------------|
| 1           | 3.4e-8        | No                          |
| 3           | N/S           | Yes                         |
| 4           | N/S           | Yes                         |
| 10          | 7.0e-45       | Yes                         |
| 17          | N/S           | Yes                         |
| 26          | N/S           | Yes                         |
| 33          | 0.0007        | Yes                         |
| 34          | 0.0002        | Yes                         |
| 37          | N/S           | Yes                         |
| 38          | 1.1e-7        | Yes                         |
| 39          | N/S           | Yes                         |
| 40          | 9.7e-17       | Yes                         |
| 51          | 3.9e-14       | Yes                         |
| 52          | 1.7e-6        | Yes                         |

\*There are multiple platelet-related categories in the GSEA results. The number in this column reflects the false discovery rate (FDR) for the top category.

**Table S7. Genes targeted by one or more eQTLs in each gene-level cluster.**

| Cluster | Targeted Genes                                                                                                                                                                                                                                                                                                                                                                                                                                                                                                                                                                                                                                                                                                                                                                                                                                                                                                                                                                                                                                                                                                                                                                                                                                                                                                                                                                                       |
|---------|------------------------------------------------------------------------------------------------------------------------------------------------------------------------------------------------------------------------------------------------------------------------------------------------------------------------------------------------------------------------------------------------------------------------------------------------------------------------------------------------------------------------------------------------------------------------------------------------------------------------------------------------------------------------------------------------------------------------------------------------------------------------------------------------------------------------------------------------------------------------------------------------------------------------------------------------------------------------------------------------------------------------------------------------------------------------------------------------------------------------------------------------------------------------------------------------------------------------------------------------------------------------------------------------------------------------------------------------------------------------------------------------------|
| 1       | <i>C6orf25, CCL5, CLU, KIAA0430, NGFRAP1, PF4, PF4V1, PPBP, PROS1, TIMP1, TREML1</i>                                                                                                                                                                                                                                                                                                                                                                                                                                                                                                                                                                                                                                                                                                                                                                                                                                                                                                                                                                                                                                                                                                                                                                                                                                                                                                                 |
| 2       | <i>DNAJC3, HECTD1, IGF1R, IQGAP2, SIGLEC10, ST8SIA4, TECPR2</i>                                                                                                                                                                                                                                                                                                                                                                                                                                                                                                                                                                                                                                                                                                                                                                                                                                                                                                                                                                                                                                                                                                                                                                                                                                                                                                                                      |
| 3       | <i>ACPI, AMIGO3, C7orf41, EMC3, GMPPB, GYPA, GYPB, MAP2K3, OPA1, PGM2L1, PIM1, RNF123, STOM, TCP11L2, TFDP1, TFDP3, UBAP1, UBE2H</i>                                                                                                                                                                                                                                                                                                                                                                                                                                                                                                                                                                                                                                                                                                                                                                                                                                                                                                                                                                                                                                                                                                                                                                                                                                                                 |
| 4       | <i>BEND2, C15orf54, CPEB4, DPM2, GABARAPL2, GCLC, GPR55, HIST1H2AB, HIST1H2AE, JAM3, LOC283788, MAP2K3, OPTN, PLEK2, SLC1A5, ZER1, ZNF542, ZSCAN5A</i>                                                                                                                                                                                                                                                                                                                                                                                                                                                                                                                                                                                                                                                                                                                                                                                                                                                                                                                                                                                                                                                                                                                                                                                                                                               |
| 5       | <i>ALDH6A1, APOO, ARG2, C14orf45, COX6CP1, CREG1, CSDE1, DCK, ENTPD5, ERCC2, GRINA, GSPT1, GSPT2, ITLN1, KLC3, MCOLN1, MOB1B, PGM2L1, PLEK2, PSMF1, R3HDM4, RNF11, ROGDI, SGIP1, SHARPIN, SLC38A5, TMEM74B, TMOD1, TSTD2, TTC25, UBE2B, VTI1B, VWCE</i>                                                                                                                                                                                                                                                                                                                                                                                                                                                                                                                                                                                                                                                                                                                                                                                                                                                                                                                                                                                                                                                                                                                                              |
| 6       | <i>C14orf57, C17orf39, DNAJA4, ESPN, ESPNP, LMOD1, MAP2K3, MKRN1, NINJ2, OAZ1, OR51A7, PGM2L1, PHOSPHO1, PPP2R5B, PTMS, RGS6, SHISA4, TNFRSF25, TPM1, VWCE, WNK1</i>                                                                                                                                                                                                                                                                                                                                                                                                                                                                                                                                                                                                                                                                                                                                                                                                                                                                                                                                                                                                                                                                                                                                                                                                                                 |
| 7       | <i>CEACAM1, CRISPLD2, DPEP3, EXTL3, GNS, HERC3, MAPK14, MME, MRV11, NAP1L5, NLRP1, PKN2, PRKDC, SDC2, SLC26A8, SNX27, SRPK1</i>                                                                                                                                                                                                                                                                                                                                                                                                                                                                                                                                                                                                                                                                                                                                                                                                                                                                                                                                                                                                                                                                                                                                                                                                                                                                      |
| 8       | <i>ACPP, C16orf57, CASS4, CD93, DICER1, DPEP2, EXTL3, FRY, G2E3, HSPA1A, HSPA1B, IMPA2, KARS3, KIAA0319L, KIAA0754, LOC100505519, LOC100507246, LOC100507570, MACF1, MAN2A2, MANSC1, MGAM, MGRN1, MSL3, NCOA3, NFIL3, NT5C2, RPN1, SIPA1L2, ST6GALNAC2, TIAM2, TRIM22, ZFYVE16, ZMYM4</i>                                                                                                                                                                                                                                                                                                                                                                                                                                                                                                                                                                                                                                                                                                                                                                                                                                                                                                                                                                                                                                                                                                            |
| 9       | <i>ACTR1A, ADAM15, ATP4A, BPIFA3, BTNL2, C12orf61, CCDC113, DCST1, DEPDC1B, DHDH, EGLN1, EIF3E, ENPP7, EXOC8, FAM73A, FOXK2, GABRB3, GDEP, HTR4, IER5, KRT3, KRT76, LIMK1, LOC100505666, MT1F, MT1H, NAP1L5, NPPB, NSRP1, NSRP1P1, PDPN, PRSS54, RAB36, RCAN3, SLC16A4, SLC27A5, SLC9C2, SNX8, SOX3, SPRTN, SRPK2, SRSF6, ST18, TRIM16, TRIM16L, WDR45L, YIF1A, ZCCHC13, ZNF446, ZNF624, ZNF77</i>                                                                                                                                                                                                                                                                                                                                                                                                                                                                                                                                                                                                                                                                                                                                                                                                                                                                                                                                                                                                   |
| 10      | <i>ABCC3, ABLIM3, AQP10, ARHGAP18, ARMC3, ASAP2, ATL1, ATP5E, BET1, C15orf26, C19orf33, C1orf198, C21orf7, C6orf25, C7orf41, CABP5, CALD1, CALM1, CALM2, CALM3, CD226, CD68, CD9, CDC14B, CERS2, CLCN3, CLEC12A, CLEC1B, CLIC4, CLU, CMIP, CMTM5, CREB3, CTSA, CTTN, DAAM1, DENND2C, EGF, EHD3, F13A1, FAM83D, FERMT3, FLNA, FN3K, GNAZ, GNB5, GNG11, GP1BA, GP1BB, GP6, GRAP2, GSTO1, GTPBP2, GUCY1A3, GUCY1B3, HIST1H3A, HIST1H3B, HIST1H3C, HIST1H3D, HIST1H3E, HIST1H3F, HIST1H3G, HIST1H3H, HIST1H3I, HIST1H3J, HOMER2, HSPD1, ILK, ITGA2B, ITGB1, ITGB3, JAM3, KIF2A, LAT, LGALS1, LIMS1, LIMS3, LIMS3L, LMNA, LOC100129617, LOC100129973, LOC100131860, LOC100288366, LOC100505813, LOC100506012, LOC100506387, LOC100507322, LOC100507472, LOC100652804, LOC100653288, LOC645513, LTBP1, LY6G6D, LY6G6E, LY6G6F, MAOB, MEIS1, MFAP3L, MMD, MMRN1, MPL, MYCT1, MYL9, NAA50, NAP1L1, NAT8B, NCKAP1, NEXN, NFIB, NRG1, PARVB, PCSK6, PDE3A, PDE5A, PDLIM1, PEX26, PF4, PF4V1, PKHD1L1, PKM, PLTP, POLH, PPBP, PRKAR2B, PRKG1, PRTFDC1, PRUNE, PTGS1, RAB27B, RBPMS2, RC3H2, RPS3A, RSU1, RUFY1, SAV1, SCFD2, SDC4, SDPR, SELP, SEPT5, SEPT5-GP1BB, SETDB1, SH3BGR2, SIAE, SLC24A3, SLC40A1, SLC6A4, SNORD73A, SPARC, SPINT2, SSX2IP, STOM, SYTL4, THBS1, TLN1, TMEM45A, TNNC2, TPM1, TREML1, TSC22D1, TSPAN33, TSPAN9, TUBA1B, TUBA8, TUBB1, USP37, VCL, VIL1, VSIG2, WASF3, YIF1B, ZCCHC17</i> |
| 11      | <i>ABHD3, AIM2, HKR1, KREMEN1, LOC100128252, LOC100128398, LOC100288114, LOC100507342, LOC283788, NAG18, NOL7, PHKB, RANBP9, SND1, SNX27, TAF7, TRAPPC2, TRAPPC2P1, ZFP112, ZNF107, ZNF134, ZNF135, ZNF154, ZNF211, ZNF256, ZNF264, ZNF274, ZNF285, ZNF304, ZNF329, ZNF383, ZNF417, ZNF418, ZNF471, ZNF542, ZNF543, ZNF547, ZNF551, ZNF577, ZNF585B, ZNF586, ZNF587, ZNF587B, ZNF595, ZNF606, ZNF671, ZNF701, ZNF702P, ZNF776, ZNF805, ZNF806, ZNF876P, ZSCAN18, ZSCAN5A</i>                                                                                                                                                                                                                                                                                                                                                                                                                                                                                                                                                                                                                                                                                                                                                                                                                                                                                                                         |
| 12      | <i>CCNB1, CD5L, GJC2, GPR68, KLHL35, LCN15, TRIM3, TRIM63</i>                                                                                                                                                                                                                                                                                                                                                                                                                                                                                                                                                                                                                                                                                                                                                                                                                                                                                                                                                                                                                                                                                                                                                                                                                                                                                                                                        |
| 13      | <i>ADSSL1, BARX1, CCDC142, ITPRIP, MRPL53, OR4C3, PPP2R1B, SDS, SLC25A19, TMEM9B</i>                                                                                                                                                                                                                                                                                                                                                                                                                                                                                                                                                                                                                                                                                                                                                                                                                                                                                                                                                                                                                                                                                                                                                                                                                                                                                                                 |
| 14      | <i>APLF, ARAP3, FLVCR1, GHRL, LOC100653018, LOC100653255, MAFG, NELL2, OPTN, SPTLC1, TTC25</i>                                                                                                                                                                                                                                                                                                                                                                                                                                                                                                                                                                                                                                                                                                                                                                                                                                                                                                                                                                                                                                                                                                                                                                                                                                                                                                       |

| Cluster | Targeted Genes                                                                                                                                                                                                                                                                                                                                                                                                                                                                                                                                                                                                                                                                                                                                                                                                                                                                                                                                       |
|---------|------------------------------------------------------------------------------------------------------------------------------------------------------------------------------------------------------------------------------------------------------------------------------------------------------------------------------------------------------------------------------------------------------------------------------------------------------------------------------------------------------------------------------------------------------------------------------------------------------------------------------------------------------------------------------------------------------------------------------------------------------------------------------------------------------------------------------------------------------------------------------------------------------------------------------------------------------|
| 15      | <i>ADAM17, CDC42EP3, CHIC2, CPEB2, CYTH4, DCBLD2, DENND3, ELF2, F11R, FAM20A, FAM65B, FCAR, FCGR1A, FCGR1B, FCGR1C, FGD4, G0S2, GPR97, HIF1A, HIF1A-AS2, HIST2H2BF, IL13RA1, IVNS1ABP, JMJD1C, KIAA0226L, LOC100506271, LOC441009, PDE4B, PGM2, PLAUR, PRKAR1A, PTGS2, RGS2, RNF175, RPL21, SLC2A14, SLC2A3, SNORA27, SNORD102, ST3GAL6, TBC1D1, TLR2, TMEM71, TNFSF13B, TRPM6, TSTD1, UBE2J1, VNN3</i>                                                                                                                                                                                                                                                                                                                                                                                                                                                                                                                                              |
| 16      | <i>ABCB10, CLK3, EDC3, GCLC, HEMGN, MAP2K3, MKNK2, PGM2L1, PIM1, RPIA, SCYL2, SLC6A9, SLC7A5, TCP11L2, TFDP1, TFDP3, TRAK2</i>                                                                                                                                                                                                                                                                                                                                                                                                                                                                                                                                                                                                                                                                                                                                                                                                                       |
| 17      | <i>C22orf13, C2orf88, CA1, CNOT7, DNAJB2, EPB49, FBXO7, FHOD3, GNAS, GNAS-AS1, GYPA, GYPB, GYPE, HK1, JAZF1, KIAA0430, LOC100291105, PCTP, PDZK1IP1, PDPDF, RBM38, RSRC1, SGIP1, SH3BGR1, SNRPD3, TBCEL, TFPI, TMEM56, TMEM56-RWDD3, TPGS2, VRK1, XK, ZDHHC2</i>                                                                                                                                                                                                                                                                                                                                                                                                                                                                                                                                                                                                                                                                                     |
| 18      | <i>ACP1, AHSP, AK1, ALDH6A1, ANKH, ARL4A, ARL6IP1, C14orf45, C17orf80, C18orf8, C22orf25, CARHSP1, COG1, CREG1, CTNNAL1, CYSTM1, DCK, DNAJB2, DNAJC6, EIF3B, EIF5, ENTPD5, ESPN, ESPNP, FAM104A, FGFR1OP2, FOXO4, GNA12, GRINA, GYPC, HBM, IGF2BP2, ITLN1, KAT2B, KIAA0430, KRT1, LGALS3, LOC100128164, LOC100130744, LOC100130930, LOC645195, MCOLN1, MKRN1, MOB1B, NEDD4L, NFE2, NPC1, ODC1, OPTN, OSBP2, PDZK1IP1, PIP4K2A, PIP5K1B, PITHD1, PLCL2, PLEK2, POC1B, POLR1D, PRDX5, PSMF1, PTMS, PTPLA, PURA, RAB2B, RANBP10, RIOK3, RNF10, SCYL2, SEC62, SLC14A1, SLC25A37, SLC25A39, SLC38A5, SMOX, SNCA, SPECC1, TAL1, TCP11L2, TESC, TMEM74B, TMOD1, TNFRSF25, TRAK2, TSNAI1, TSTD2, UBXN6, USP12, VN1R3, VWCE, YIPF6, ZFAND4</i>                                                                                                                                                                                                                |
| 19      | <i>ACSL4, AGPAT9, AMPD2, ARSG, ATF6, BIN2, C20orf3, CASP2, CD300LF, CERS2, CKAP4, CPD, CYFIP2, DHRS9, DICER1, DOCK2, GAPVD1, GPR65, GUSBP11, HM13, HSDL2, IDI1, IDI2-AS1, JAK3, JMJD1C, MAPKAPK3, MPZL1, OGDH, P2RX1, PADI4, PAQR7, PILRA, PKN1, PRAM1, PSIMCT-1, RAB37, RGL4, RICTOR, SETDB1, SH2D3C, SLC11A1, SLC25A44, SRPK2, TCP11L2, TGM3, VAV1, WAS, WIPI1</i>                                                                                                                                                                                                                                                                                                                                                                                                                                                                                                                                                                                 |
| 20      | <i>ABCA13, BPI, CEACAM8, DEFA4, DEFA8P, LCN2, LTF, MMP8, OLFM4, OLR1, TCN1</i>                                                                                                                                                                                                                                                                                                                                                                                                                                                                                                                                                                                                                                                                                                                                                                                                                                                                       |
| 21      | <i>BMP8A, BMP8B, BTF3, BTF3P9, HSPD1, IGF2BP3, KCNG2, OXCT2, TBC1D16</i>                                                                                                                                                                                                                                                                                                                                                                                                                                                                                                                                                                                                                                                                                                                                                                                                                                                                             |
| 22      | <i>ACSL1, ARRB1, BCL2A1, BMX, C15orf37, CSF2RB, DYSF, EXTL3, HNRPDL, KIAA0319, LOC145474, LOC731424, MLPH, MTHFS, NLRC4, PIR, PROK2, PYGL, SIPA1L1, SRPK1, ST20, ST20-MTHFS, SYNE2, TDP2, WWC3</i>                                                                                                                                                                                                                                                                                                                                                                                                                                                                                                                                                                                                                                                                                                                                                   |
| 23      | <i>C11orf58, CDC34, DCAF6, NFIX, SLC25A37, SLC4A1, SLC7A5, STOM, TSPAN5, UBAP1, ZMAT2</i>                                                                                                                                                                                                                                                                                                                                                                                                                                                                                                                                                                                                                                                                                                                                                                                                                                                            |
| 24      | <i>ABHD2, AIF1, AKAP13, C2orf88, CACNB4, CD14, CD93, CHI3L1, CHSY1, CLEC2B, CNEP1R1, CYP4F2, CYP4F3, F11R, FCAR, GLIPR2, HEATR5A, HPSE, HRH2, IGF1R, IGF2R, ITGA5, KIAA0319L, LOC100132495, LOC100652973, LOC729603, MEGF9, MICAL2, MYL4, NOTCH2, NOTCH2NL, PCNX, PI3, PPP2R5B, PTPRJ, SERPING1, SGK1, SLC38A5, SPG21, STK38L, STXBP5, TNFRSF9, TSTD1, VNN2, WDFY3, WDFY3-AS2, YAP1, ZMYM4</i>                                                                                                                                                                                                                                                                                                                                                                                                                                                                                                                                                       |
| 25      | <i>ABCG2, AK1, ALDH5A1, ALDH6A1, AP2S1, APOO, ARL6IP1, ASH2L, BABAM1, BLVRB, C12orf29, C14orf45, C17orf80, C22orf13, C2orf88, C4A, C4B, C5orf4, CAPN5, CCBP2, CCDC90A, CHI3L1, CMAS, COG1, CSDA, CSDAP1, CTDSP2, CYB5A, CYP8B1, CYSTM1, DHFRL1, DNAJC6, DSERG1, EIF1B, EIF4EBP2, ENTPD5, ERCC2, F11R, FAM104A, FAM46C, FGFR1OP2, FLJ33065, FNBP1L, GPLD1, H1F0, HAGH, HEMGN, HK1, HRH2, IGF2R, ITLN1, ITSN1, KAT2B, KIAA0319L, KLC3, LGALS3, LOC100293534, LOC100505828, LOC645195, LOC729603, MAP2K3, MARCH8, MARK3, MBOAT2, MGST3, MICAL2, MYL4, NCOA4, NFIA, NOL7, NSUN3, NTAN1, OPA1, OPTN, OSBP2, PCGF5, PDCD10, PFDN5, PIK3R2, PIP5K1B, PPP2R5B, PTK2B, PTMS, PURA, RAB2B, RAD23A, RANBP9, RASGRP3, RIOK3, ROGDI, RPIA, SCYL2, SFRP2, SH3BGR1, SHARPIN, SHISA4, SIAH2, SLC38A5, SLC7A5, SNCA, SNRPD3, SPECC1, STOML2, STXBP1, TFDP1, TFDP2, TFDP3, TERC, TMEM86B, TMEM9B, TRAK2, TSTA3, TSTD1, UBXN11, USP7, VWCE, WDFY3, WDFY3-AS2, ZMYM4</i> |
| 26      | <i>C15orf54, ENKUR, HSPD1, MAP1B, MYCT1, PPBP, RGS18</i>                                                                                                                                                                                                                                                                                                                                                                                                                                                                                                                                                                                                                                                                                                                                                                                                                                                                                             |
| 27      | <i>B4GALT5, FAM126B, FRY, HNRNPA1, MSL3, SLC9A8, TXNRD1</i>                                                                                                                                                                                                                                                                                                                                                                                                                                                                                                                                                                                                                                                                                                                                                                                                                                                                                          |
| 28      | <i>C15orf54, EHD3, ENKUR, HSPD1, LIMS1, LIMS3, LIMS3L, MYCT1, RAB27B, RHOTB1</i>                                                                                                                                                                                                                                                                                                                                                                                                                                                                                                                                                                                                                                                                                                                                                                                                                                                                     |



| Cluster | Targeted Genes                                                                                                                                                                                                                                                                                                                                                                                                                  |
|---------|---------------------------------------------------------------------------------------------------------------------------------------------------------------------------------------------------------------------------------------------------------------------------------------------------------------------------------------------------------------------------------------------------------------------------------|
| 29      | <i>ADAMTSL4, AHR, ARHGAP26, ARHGEF40, C1orf138, CCDC19, CCPG1, CD97, CREB1, CRIP1, DMXL2, DDX1C1-CCPG1, EMR2, ERGIC2, FAR2, JMJD1C, LOC100506290, LOC100506606, LOC100653153, MCL1, METTL21A, MS4A6A, MYADM, PIGB, RFX2, SERPINI2, TAGAP, TIPARP, TIPARP-AS1, TSPAN2, VIM, WDR49, ZNF219</i>                                                                                                                                    |
| 30      | <i>ABCA13, BPI, CEACAM3, CEACAM5, CEACAM6, CEACAM8, DEFA4, DEFA8P, ERG, MMP8, OLFM4, OLR1, PCOLCE2</i>                                                                                                                                                                                                                                                                                                                          |
| 31      | <i>BMP10, CCDC155, FGF11, LINC00174, SCN1B, VPS37B</i>                                                                                                                                                                                                                                                                                                                                                                          |
| 32      | <i>ALMS1, ALMS1P, CCL5, ELSBPB1, FAM71E1, MGC40069, MRPL4, OR4D1, OR4D11, PRELP, TRAV8-3</i>                                                                                                                                                                                                                                                                                                                                    |
| 33      | <i>AQP10, CLU, CNST, CXCL5, ITGA2B, ITGB3</i>                                                                                                                                                                                                                                                                                                                                                                                   |
| 34      | <i>ABLIM3, GUCY1B3, ITGB3, LTBP1, MMRN1, PROS1</i>                                                                                                                                                                                                                                                                                                                                                                              |
| 35      | <i>HIST1H1C, HIST1H2AC, HIST1H2AD, HIST1H2BD, HIST1H3A, HIST1H3B, HIST1H3C, HIST1H3D, HIST1H3E, HIST1H3F, HIST1H3G, HIST1H3H, HIST1H3I, HIST1H3J, HIST1H4A, HIST1H4B, HIST1H4C, HIST1H4D, HIST1H4E, HIST1H4F, HIST1H4H, HIST1H4I, HIST1H4J, HIST1H4K, HIST1H4L, HIST2H2AA3, HIST2H2AA4, HIST2H2BE, HIST2H2BF, HIST2H3A, HIST2H3C, HIST2H3D, HIST2H4A, HIST2H4B, HIST4H4</i>                                                     |
| 36      | <i>ASPH, DOCK4, HEY1, KIAA0319, RB1, RCBTB2, SHKBP1, TDP2</i>                                                                                                                                                                                                                                                                                                                                                                   |
| 37      | <i>ALDH6A1, C14orf45, DCK, ENTPD5, HPS1, MOB1B, PGM2L1, PSME4, PSMF1, TMEM74B, ZFAND4</i>                                                                                                                                                                                                                                                                                                                                       |
| 38      | <i>ABLIM3, APP, ASPH, BMP6, C15orf54, C1orf198, CREB3, CTDSPL, CTTN, DCLRE1A, DOCK4, HEY1, HSPD1, ITGA2B, ITGB3, KIAA0319, LOC100505813, LOC283788, LTBP1, MPZL3, MYCT1, MYL9, NAT8B, PI3, PTGS1, RAB27B, RB1, RCBTB2, RHOBTB1, SHKBP1, SPARC, TDP2, TLN1, ZNF542, ZSCAN5A</i>                                                                                                                                                  |
| 39      | <i>ARHGEF40, CRIP1, FCGR1A, FCGR1B, FCGR1C, GBP1, GBP2, GBP3, GBP4, GBP5, GBP7, GLS, HIST2H2BF, LOC100131190, LPCAT2, MX2, MYADM, OBFC1, PSTPIP2, RICTOR, SOCS6, STAT1, TAGAP, USP4, UTP18, ZNF219</i>                                                                                                                                                                                                                          |
| 40      | <i>APP, C6orf25, CLU, CTTN, ITGA2B, ITGB3, LOC100505813, LTBP1, MYLK, PROS1, SPARC, THBS1, VCL</i>                                                                                                                                                                                                                                                                                                                              |
| 41      | <i>ATP5SL, C17orf62, CLDN15, FBXL22, FRAT2, GK, GK3P, GRM3, HERC1, HPS6, LCE3C, LOC100130855, NXF5, PNLDC1, REEP2, SMTNL2, SPSB4, STAP1, ZNF439, ZNF440</i>                                                                                                                                                                                                                                                                     |
| 42      | <i>ASPM, C7orf41, CDC7, CTSB, EIF1B, EMC3, FBX09, FLJ33065, GYPA, GYPB, OPA1, PPDPF, SEPT14, SH3BGRL, WDR67, ZMAT2</i>                                                                                                                                                                                                                                                                                                          |
| 43      | <i>CD58, CXorf65, FLVCR1, GHRL, HCAR1, HCAR2, HCAR3, IFIH1, IL1B, IL2RG, KLHL5, MT1G, NAP1L4, NBN, NFKB2, PI3, PLXNC1, RELB, REPS2, RNF19B, SBF2, TTLL4</i>                                                                                                                                                                                                                                                                     |
| 44      | <i>BTN2A1, BTN2A2, BTN3A1, BTN3A2, BTN3A3, HCP5, HLA-E, HLA-F, LOC100507463, LOC100653072, PSMB8, PSMB9, SPG11, TAP1</i>                                                                                                                                                                                                                                                                                                        |
| 45      | <i>AIPL1, CCDC37, CD6, CLK2, CLK2P, CYP2C19, GSK3A, OVOL2, STAMBPL1, ZNF746</i>                                                                                                                                                                                                                                                                                                                                                 |
| 46      | <i>EPS8L1, ERICH1-AS1, FERD3L, IDUA, IRAK1, KCNK5, LOC100286925, LOC401442, OR7E154P, OTOP1, PPM1F, RBMXL3, SLC26A1, ZNF414</i>                                                                                                                                                                                                                                                                                                 |
| 47      | <i>ERICH1-AS1, FBXO17, FERD3L, IRAK1, KCNK5, KIAA1274, LOC401442, RBMXL3, SARS2, ULK3, ZNF414</i>                                                                                                                                                                                                                                                                                                                               |
| 48      | <i>BCL6, CCNJL, IL1R1, IL1RAP, IL8, P2RY13, TBL1X, TBL1XR1</i>                                                                                                                                                                                                                                                                                                                                                                  |
| 49      | <i>ACP1, ADIPOR1, AHSP, ARG2, ATG9A, C5orf4, C9orf153, CA1, DCAF12, DNAJB4, EMC3, EPB41, FAM46C, GCLC, GMPR, ISCA1, ISCU, KIAA1586, LOC100291105, LUZP6, MAP1LC3B, MAP1LC3B2, MBOAT2, MKRN1, MTPN, NCOA4, ODC1, OPA1, PCGF5, RAB2B, RBM38, RGS10, RNF10, SCYL2, SELK, SFRP2, SIAH2, SLC14A1, SLC25A37, SRRD, SWT1, TBCEL, TCP11L2, TFIP11, TGM2, TMC5, TMEM200B, TRAK2, TSPAN7, VN1R3, VTI1B, YIPF6, ZFAND2B, ZNF23, ZNF451</i> |
| 50      | <i>AKR1C3, B4GALT6, BNC2, CD160, CD247, CD38, CD8A, GLS, GZMB, GZMH, IGFBP7, IL2RB, KLRF1, LINC00299, LOC100130872, LOC646778, NCAM1, PRF1, RNF165, SH2D1B, SLC4A7, SPON2, STAT1, TBC1D19, TKTL1, TXK</i>                                                                                                                                                                                                                       |

| Cluster | Targeted Genes                                                                                                                                                                                                                                                                                                                                                                                                                                                                                                                                                                                                                                                                                                                                                                                                                                                                                                                                                                                                                                                                                                                                                                                                                                                                                                                                                                                                                            |
|---------|-------------------------------------------------------------------------------------------------------------------------------------------------------------------------------------------------------------------------------------------------------------------------------------------------------------------------------------------------------------------------------------------------------------------------------------------------------------------------------------------------------------------------------------------------------------------------------------------------------------------------------------------------------------------------------------------------------------------------------------------------------------------------------------------------------------------------------------------------------------------------------------------------------------------------------------------------------------------------------------------------------------------------------------------------------------------------------------------------------------------------------------------------------------------------------------------------------------------------------------------------------------------------------------------------------------------------------------------------------------------------------------------------------------------------------------------|
| 51      | <i>ACIN1, ACP1, AHSP, AKT2, ALDH6A1, AMIGO3, ANK1, ANP32B, AP2A1, APP, AQP1, ARF1, ARG2, ARHGEF12, ATP11B, ATP5E, BAG6, BLVRB, BMP6, BNIP3L, BPGM, BST2, C12orf51, C14orf45, C15orf54, C22orf13, C22orf25, C22orf32, C2orf88, C6orf25, C7orf41, CA1, CA2, CARM1, CCNI, CLCN3, CLEC12A, CLEC1B, CLU, CNPPD1, CNST, COPS2, CORO1C, CREB3, CSDE1, CTDSPL, DCAF12, DCLRE1A, DCUN1D1, DDB1, DPM2, EEF2, EIF1B, EIF2C2, EMC3, ENTPD5, EPB49, ESPN, ESPNP, F13A1, FAM134A, FECH, FIS1, FKBP8, FLJ33065, FLNA, FOXO4, FURIN, FUZ, GABARAPL2, GADD45A, GMPPB, GNAZ, GNG12, GYP A, GYPB, GYPE, HBD, HEMGN, HIST1H2AB, HIST1H2AE, HSPD1, ITLN1, KIAA0430, LGALS3, LOC100130930, LOC100505813, LOC100506023, LOC100507472, LOC100631377, LOC653562, LRP10, MAK, MAN2A2, MAOA, MAP1LC3B, MAP1LC3B2, MARCH8, MCOLN1, MICAL2, MICALCL, MIR3620, MYCT1, MYL9, NCOA4, NDUFA3, NDUFA6, NEXN, NRGN, OPA1, OR2A1, OR2W3, PCMTD1, PCSK6, PDCD10, PGRMC1, PIM1, PINK1, PITHD1, PKHD1L1, PLEKHG3, PLVAP, PNPLA2, POLL, PPM1A, PPP6R1, PRDX6, PTGS1, RAB11A, RAB27B, RBX1, RGS10, RGS18, RNF10, RNF123, RPL7AP60, RSU1, RXRA, SCYL2, SDPR, SELK, SELP, SEPT11, SH3BGR12, SLC6A10P, SLC6A8, SNORD37, SNRPD3, SPARC, SPTB, ST3GAL1, STK11, STOM, TAX1BP1, TIMM23, TLN1, TMEM14B, TNFRSF25, TNFSF4, TNS1, TRAK2, TREML1, TRIM23, TRIM58, TSPAN5, TSPAN9, TUBB1, UBXN6, UQCR11, VCL, VN1R3, VTI1B, VWCE, WASF2, WDT C1, WNK1, XPNPEP3, YIPF2, YY1AP1, ZER1, ZMAT2</i> |
| 52      | <i>APP, C6orf25, C7orf41, CTDSPL, EPB49, FLNA, LOC100505813, MYL9, NRGN, PTGS1, RGS18, SPARC</i>                                                                                                                                                                                                                                                                                                                                                                                                                                                                                                                                                                                                                                                                                                                                                                                                                                                                                                                                                                                                                                                                                                                                                                                                                                                                                                                                          |
| 53      | <i>ASCC2, BSG, FIS1, HEXIM1, MYL4, PSMF1, RAB2B, ROGDI, TMEM74B, UBAP1, UBB</i>                                                                                                                                                                                                                                                                                                                                                                                                                                                                                                                                                                                                                                                                                                                                                                                                                                                                                                                                                                                                                                                                                                                                                                                                                                                                                                                                                           |
| 54      | <i>ADIPOR1, ALDH6A1, ARF1, BAG1, BPGM, BSG, C14orf45, C5orf4, CA1, CAPRIN2, CARM1, CETN2, COPS2, CTSB, DENND4A, DNAJB14, ENTPD5, FAM214B, GYP A, GYPB, GYPE, LOC100131015, LOC646358, MBNL3, MIR3620, RHBDD1, RIOK3, RNF10, SLC14A1, SLC1A5, SLC25A28, SLC4A1, SLC6A9, SLC7A5, SOX6, SPECC1, STIL, TFRC, TIAL1, TMEM56, TMEM56-RWDD3, TRIP12, UBA52, UBE2O, USP7, VRK1, WBP2, WDR67, YIPF2, ZMAT2</i>                                                                                                                                                                                                                                                                                                                                                                                                                                                                                                                                                                                                                                                                                                                                                                                                                                                                                                                                                                                                                                     |
| 55      | <i>EHD2, GGT5, GNA11, IZUMO4, KRT86, LILRA4, SYNM, TFDP1, TFDP3</i>                                                                                                                                                                                                                                                                                                                                                                                                                                                                                                                                                                                                                                                                                                                                                                                                                                                                                                                                                                                                                                                                                                                                                                                                                                                                                                                                                                       |
| 56      | <i>DGKG, MANSC1, MTOR, MTOR-AS1, NCKAP1L, PI4KB, PRR13, ZNF687</i>                                                                                                                                                                                                                                                                                                                                                                                                                                                                                                                                                                                                                                                                                                                                                                                                                                                                                                                                                                                                                                                                                                                                                                                                                                                                                                                                                                        |
| 57      | <i>ABCA13, BPI, CEACAM8, CRISP3, DEFA4, DEFA8P, LCN2, MMP8, OLFM4</i>                                                                                                                                                                                                                                                                                                                                                                                                                                                                                                                                                                                                                                                                                                                                                                                                                                                                                                                                                                                                                                                                                                                                                                                                                                                                                                                                                                     |
| 58      | <i>CDH3, DVL3, FAM167A, FAM43A, GPBAR1, HERPUD1, IRX5, LOC100288144, OR51G2, PTGES2, REEP6, RTEL1, RTEL1-TNFRSF6B, SCN2B, SERPINB13, SGCE, TAF1L, THRSP, TMEM179, TNFRSF6B, TUSC3</i>                                                                                                                                                                                                                                                                                                                                                                                                                                                                                                                                                                                                                                                                                                                                                                                                                                                                                                                                                                                                                                                                                                                                                                                                                                                     |
| 59      | <i>ABCC13, AK1, C5orf4, CDC34, DHFRL1, E2F2, EPB41, GDE1, GUK1, GYPC, HAGH, HBM, HDGF, JAZF1, KIAA0430, LOC100291105, MAF1, MAP2K3, NCOA4, NSUN3, PLEKHG3, RBM38, ROGDI, RPIA, SCYL2, SLC14A1, SPTB, ST6GALNAC4, TBCEL, TCP11L2, TFDP1, TFDP3, TMEM200B, TRAK2, UBAP1, UBB, UBE2O</i>                                                                                                                                                                                                                                                                                                                                                                                                                                                                                                                                                                                                                                                                                                                                                                                                                                                                                                                                                                                                                                                                                                                                                     |

\*Genes listed for each cluster were found to be associated with at least one eQTL in the cluster at FDR≤0.05. All genes targeted by each Affymetrix transcript cluster are listed.

**Table S8. Clusters related to transcription factors**

| Cluster No. | Transcription Factor Motif | Transcription Factor Gene | FDR     |
|-------------|----------------------------|---------------------------|---------|
| 1           | TTCYNRGAA                  | <i>STAT5B</i>             | 4.3E-04 |
| 1           | NAWTTCYNGGAAWTN            | <i>STAT5B</i>             | 5.9E-03 |
| 10          | RYTTCCTG                   | <i>ETS2</i>               | 1.4E-08 |
| 10          | GGGCGGR                    | <i>SP1</i>                | 4.6E-07 |
| 10          | CAGGTG                     | <i>TCF3</i>               | 5.7E-06 |
| 10          | CATTGTYT                   | <i>SOX9</i>               | 8.2E-06 |
| 10          | GGGAGGRR                   | <i>MAZ</i>                | 3.8E-05 |
| 18          | GGGCGGR                    | <i>SP1</i>                | 8.2E-04 |
| 18          | CAGGTG                     | <i>TCF3</i>               | 1.2E-03 |
| 18          | GGGAGGRR                   | <i>MAZ</i>                | 1.6E-03 |
| 18          | CTTTGA                     | <i>LEF1</i>               | 5.2E-03 |
| 19          | RNWMBAGGAART               | <i>ELF1</i>               | 2.5E-03 |
| 19          | MGGAAGTG                   | <i>GABPA</i>              | 4.6E-03 |
| 19          | RGAGGAARY                  | <i>SPI1</i>               | 4.6E-03 |
| 19          | RYTTCCTG                   | <i>ETS2</i>               | 4.6E-03 |
| 24          | CTTTGT                     | <i>LEF1</i>               | 3.5E-03 |
| 25          | GGGCGGR                    | <i>SP1</i>                | 2.3E-03 |
| 25          | CTTTGA                     | <i>LEF1</i>               | 2.5E-03 |
| 25          | TGCCAAR                    | <i>NF1</i>                | 2.6E-03 |
| 25          | TTGTTT                     | <i>MLLT7</i>              | 2.6E-03 |
| 25          | GGGTGGR                    | <i>PAX4</i>               | 3.4E-03 |
| 25          | TGAMCTTTGNCCN              | <i>HNF4A</i>              | 6.3E-03 |
| 25          | TGAMCTTTGMMCYT             | <i>HNF4A</i>              | 6.4E-03 |
| 29          | TGAAA                      | <i>NFAT/NFATC</i>         | 8.5E-03 |
| 35          | TATAAA                     | <i>TAF/TATA</i>           | 8.8E-04 |
| 35          | TATGCAAATN                 | <i>POU2F1</i>             | 6.8E-03 |
| 38          | KRCAGGAARTRNKT             | <i>ETS2</i>               | 8.6E-04 |
| 38          | CGTACGTGCNGB               | <i>HIF1A</i>              | 8.2E-03 |
| 38          | WNTAATCCCAR                | <i>PITX2</i>              | 9.0E-03 |
| 40          | DCCWTATATGGNCWN            | <i>SRF</i>                | 1.1E-04 |
| 40          | TGANTCA                    | <i>JUN</i>                | 1.7E-03 |
| 40          | CCAWATAWGGMNMNG            | <i>SRF</i>                | 4.2E-03 |
| 40          | SCCAWATAWGGMNMNNN          | <i>SRF</i>                | 4.2E-03 |
| 40          | GNCCAWATAWGGMN             | <i>SRF</i>                | 5.2E-03 |
| 40          | WNTAATCCCAR                | <i>PITX2</i>              | 5.7E-03 |
| 40          | ATGCCCATATATGGWNNT         | <i>SRF</i>                | 8.7E-03 |
| 43          | NNNGATRNNN                 | <i>GATA2</i>              | 4.7E-03 |
| 44          | GAAAAGYGAAASY              | <i>IRF2</i>               | 8.4E-04 |
| 44          | RAARTGAAACTG               | <i>IRF8</i>               | 4.0E-03 |
| 44          | SAAAAGYGAAACC              | <i>IRF1</i>               | 4.0E-03 |
| 49          | GTGACGY                    | <i>E4F1</i>               | 4.6E-05 |
| 51          | GGGCGGR                    | <i>SP1</i>                | 4.6E-12 |
| 51          | RGCANGCGY                  | <i>NRF1</i>               | 8.1E-07 |
| 51          | KRCAGGAARTRNKT             | <i>ETS2</i>               | 2.2E-05 |
| 51          | GGGAGGRR                   | <i>MAZ</i>                | 2.3E-05 |
| 51          | GTGACGY                    | <i>E4F1</i>               | 1.7E-04 |

\*Specific GSEA gene sets (defined by promoter motifs and corresponding transcriptions factors) were compared to the gene sets targeted by each cluster, and the corresponding enrichment FDRs were calculated.

**Table S9. Clusters targeting transcripts that as a group, are significantly enriched with targets of micro RNAs.**

| Cluster No. | GSEA gene set related to Micro RNA targets**         | Number of genes targeted by cluster that are also associated with measured levels of at least one of these miRNA*** | Number of genes targeted by the cluster |
|-------------|------------------------------------------------------|---------------------------------------------------------------------------------------------------------------------|-----------------------------------------|
| 8           | MIR-192, MIR-215*                                    | 13                                                                                                                  | 26                                      |
| 17          | MIR-136*                                             | N/S                                                                                                                 | 26                                      |
| 18          | MIR-515-3P*, MIR-524*, MIR-506*                      | N/S                                                                                                                 | 73                                      |
| 19          | MIR-196A*, MIR-196B, MIR-148A, MIR-152, MIR-148B     | 7                                                                                                                   | 43                                      |
| 25          | MIR-323, MIR-124A*                                   | 0                                                                                                                   | 93                                      |
| 29          | MIR-142-5P, MIR-506*                                 | 6                                                                                                                   | 20                                      |
| 43          | MIR-31                                               | 0                                                                                                                   | 18                                      |
| 49          | MIR-515-3P*, MIR-124A*                               |                                                                                                                     | 44                                      |
| 50          | MIR-30, MIR-452*                                     | 2                                                                                                                   | 23                                      |
| 51          | MIR-15A, MIR-16, MIR-15B, MIR-195, MIR-424, MIR-497* | 119                                                                                                                 | 141                                     |

\* These miRNAs are not available

\*\* To obtain microRNA targets per cluster, we performed GSEA analysis (on microRNA target category) on transcripts targeted by each cluster. We filtered the GSEA results at FDR<0.05. GSEA may output multiple microRNAs for one cluster. We list all the microRNA results for each cluster in this column.

\*\*\* After the GSEA analysis, we confirmed our findings to see if the microRNA-transcript pair are indeed observed in our microRNA-mRNA coexpression database above. We reported the number of confirmed transcripts per cluster in this column.

**Table S10. GWAS-associated cis- and trans-eQTLs, that overlap with the NHGRI GWAS catalog (downloaded on June 5, 2016, filtered by association  $p < 5E-8$ ).**

Available as a separate spreadsheet in Additional file 2.xlsx. Sheet 1: 2359 rows; Overlaps with lead eQTLs or with  $>80\%$   $R^2$  of lead eQTL. Sheet 2: 13,354 rows; Overlaps with all significant eQTLs.

**Table S11. 58 Coronary Artery Disease GWAS Loci**

| Locus Name          | New Lead variant             | Chr | Position  | Cytoband | Reported p-value | Position Relative to Nearest Gene(s)       | Published eGenes  |
|---------------------|------------------------------|-----|-----------|----------|------------------|--------------------------------------------|-------------------|
| 7q22                | rs10953541                   | 7   | 107244545 | 7q22.3   | 1.0E-05          | Intronic to BCAP29                         |                   |
| 9p21                | rs2891168                    | 9   | 22098619  | 9p21.3   | 2.3E-98          | Intronic to CDKN2B-AS1, upstream of CDKN2B | <i>CDKN2B</i>     |
| ABCG5-ABCG8         | chr2:44074126:<br>D or alias | 2   | 44074126  | 2p21     | 2.6E-08          | Intronic to ABCG8.                         |                   |
|                     | rs6544713                    |     |           |          |                  |                                            |                   |
| ABO                 | rs2519093                    | 9   | 136141870 | 9q34.2   | 1.2E-11          | intronic to ABO                            | <i>ABO</i>        |
| ADAMTS7             | rs4468572                    | 15  | 79124475  | 15q25.1  | 4.4E-16          | upstream (20kb) of ADAMTS7                 |                   |
| ADTRP-C6orf105      | rs6903956                    | 6   | 11774583  | 6p24.1   | 9.6E-01          | Intronic to ADTRP                          |                   |
| AK097927            | rs16986953                   | 2   | 19942473  | 2p24.1   | 1.5E-08          | downstream (150kb) of WDR35                |                   |
| ANKS1A              | rs17609940                   | 6   | 35034800  | 6p21.31  |                  | intronic to ANKS1A                         |                   |
| APOB                | rs192011340                  | 2   | 21378433  | 2p24.1   | 2.9E-08          | downstream of TDRD15                       |                   |
| APOE-APOC1          | rs4420638                    | 19  | 45422946  | 19q13.32 | 7.1E-11          | downstream of APOC1                        | <i>TOMM40</i>     |
| ATP2B1              | rs2681472                    | 12  | 90008959  | 12q21.33 | 6.2E-11          | intronic to ATP2B1                         |                   |
| BCAS3               | rs7212798                    | 17  | 59013488  | 17q23.2  | 1.9E-08          | intronic to BCAS3                          |                   |
| COL4A1/A2           | rs11838776                   | 13  | 111040681 | 13q34    | 1.8E-10          | intronic to COL4A2, upstream of COL4A1     |                   |
| CXCL12              | rs1870634                    | 10  | 44480811  | 10q11.21 | 5.6E-15          | downstream of LINC00841, LINC00840         |                   |
| CYP17A1-CNNM2-NT5C2 | rs11191416                   | 10  | 104604916 | 10q24.32 | 4.7E-09          | upstream of CYP17A1, BORCS7                |                   |
| EDNRA               | rs4593108                    | 4   | 148281001 | 4q31.22  | 8.8E-10          | upstream (200kb) of EDNRA                  |                   |
| FLT1                | rs9319428                    | 13  | 28973621  | 13q12.3  | 7.1E-05          | intronic to FLT1                           |                   |
| FURIN-FES           | rs17514846                   | 15  | 91416300  | 15q26.1  | 3.1E-07          | intronic to FURIN, upstream of FES         | <i>FES, FURIN</i> |
| GUCY1A3             | rs72689147                   | 4   | 156639888 | 4q32.1   | 6.1E-09          | intronic to GUCY1A3                        |                   |

| Locus Name  | New Lead variant                                     | Chr | Position  | Cytoband | Reported p-value | Position Relative to Nearest Gene(s)                                             | Published eGenes |
|-------------|------------------------------------------------------|-----|-----------|----------|------------------|----------------------------------------------------------------------------------|------------------|
| HDAC9       | rs2107595                                            | 7   | 19049388  | 7p21.1   | 8.1E-11          | downstream of HDAC9                                                              |                  |
| HHIPL1      | rs10139550                                           | 14  | 100145710 | 14q32.2  | 1.4E-08          | downstream of HHIPL1, upstream of CYP46A1                                        |                  |
| IL6R        | rs6689306                                            | 1   | 154395946 | 1q21.3   | 2.6E-09          | first intron of IL6R                                                             | <i>IL6R*</i>     |
| KCNE2       | rs28451064                                           | 21  | 35593827  | 21q22.11 | 1.3E-15          | downstream (100kb) of SLC5A3, downstream of LINC00310, upstream (100kb) of KCNE2 | <i>MRPS6</i>     |
| KCNK5       | rs56336142                                           | 6   | 39134099  | 6p21.2   | 1.9E-08          | downstream of KCNK5, upstream (50kb) of SAYSD1                                   |                  |
| KIAA1462    | rs2487928                                            | 10  | 30323892  | 10p11.23 | 4.4E-11          | intronic to KIAA1462                                                             |                  |
| KSR2        | rs11830157                                           | 12  | 118265441 | 12q24.23 | 3.9E-04          | intronic to KSR2                                                                 | <i>RFC5</i>      |
| LDLR        | rs56289821 (old lead variant rs1122608 used instead) | 19  | 11187997  | 19p13.2  | 4.4E-15          | downstream of SMARCA4, upstream of LDLR, downstream (200 kb) of DNMT2, ILF3      | <i>SMARCA4*</i>  |
| LIPA        | rs1412444                                            | 10  | 91002927  | 10q23.31 | 5.2E-12          | intronic to LIPA                                                                 |                  |
| LPL         | rs264                                                | 8   | 19813180  | 8p21.3   | 1.1E-5           | intronic to LPL                                                                  | <i>LPL*</i>      |
| MFGE8-ABHD2 | rs8042271                                            | 15  | 89574218  | 15q26.1  | 3.7E-08          | upstream of MFGE8, ABHD2.                                                        |                  |
| MIA3        | rs67180937                                           | 1   | 222823743 | 1q41     | 1.0E-12          | intronic to MIA3                                                                 |                  |
| MRAS        | rs139016349                                          | 3   | 138099161 | 3q22.3   | 2.9E-09          | intronic to MRAS                                                                 |                  |
| NOS3        | rs3918226                                            | 7   | 150690176 | 7q36.1   | 1.7E-09          | intronic to or upstream of NOS3                                                  |                  |
| PCSK9       | rs11206510                                           | 1   | 55496039  | 1p32.3   | 2.3E-08          | upstream of PCSK9                                                                |                  |
| PDGFD       | rs2128739                                            | 11  | 103673277 | 11q22.3  | 7.1E-11          | downstream (100kb) of PDGFD                                                      |                  |
| PHACTR1     | rs9349379                                            | 6   | 12903957  | 6p24.1   | 1.8E-42          | intronic to PHACTR1                                                              |                  |
| PLG         | rs4252185                                            | 6   | 161123451 | 6q26     | 1.6E-32          | intronic (first intron) to PLG                                                   | <i>PLG</i>       |
| PMAIP1-MC4R | rs663129                                             | 18  | 57838401  | 18q21.32 | 3.2E-08          | nearest genes (200kb) are MC4R and PMAIP1                                        |                  |

| Locus Name        | New Lead variant | Chr | Position  | Cytoband | Reported p-value | Position Relative to Nearest Gene(s)                                                                                         | Published eGenes                |
|-------------------|------------------|-----|-----------|----------|------------------|------------------------------------------------------------------------------------------------------------------------------|---------------------------------|
| POM121L9P-ADORA2A | rs180803         | 22  | 24658858  | 22q11.23 | 1.6E-10          | intronic to POM121L9P                                                                                                        |                                 |
| PPAP2B            | rs9970807        | 1   | 56965664  | 1p32.2   | 5.0E-14          | Intronic (last intron) to PLPP3                                                                                              |                                 |
| RAI1-PEMT-RASD1   | rs12936587       | 17  | 17543722  | 17p11.2  | 8.2E-04          | 120 kb downstream of SREBF1, closest gene is RAI1, then upstream of PEMT                                                     | <i>RASD1, SMCR3, PEMT</i>       |
| REST-NOA1         | rs17087335       | 4   | 57838583  | 4q12     | 4.6E-08          | Intronic to NOA1, upstream to POLR2B, 40kb downstream of REST                                                                | <i>LOC285453, IGFBP7, REST*</i> |
| SH2B3             | rs3184504        | 12  | 111884608 | 12q24.12 | 1.0E-09          | exonic to SH2B3 (2nd exon, in translated region). Downstream of ATXN2. 200kb upstream of ALDH2, 500 kb downstream of TMEM116 |                                 |
| SLC22A3-LPAL2-LPA | rs55730499       | 6   | 161005610 | 6q25.3   | 5.4E-39          | intronic to LPA, 120kb upstream of PLG, 100 kb downstream of SLC22A3                                                         |                                 |
| SLC22A4-SLC22A5   | rs273909         | 5   | 131667353 | 5q31.1   | 1.2E-04          | intronic to SLC22A4, 40 kb upstream of SLC22A5, 120 kb upstream of P4HA2, 120 kb downstream of IRF1                          | <i>SLC22A4-SLC22A5</i>          |
| SMAD3             | rs56062135       | 15  | 67455630  | 15q22.33 | 4.5E-09          | intronic (first intron) to or upstream of SMAD3. PIAS1 is 700 kb distant                                                     |                                 |
| SMG6              | rs216172         | 17  | 2126504   | 17p13.3  | 5.1E-07          | intronic to SMG6                                                                                                             | <i>SMG6</i>                     |



| Locus Name         | New Lead variant                                   | Chr | Position  | Cytoband | Reported p-value | Position Relative to Nearest Gene(s)                                                                       | Published eGenes                 |
|--------------------|----------------------------------------------------|-----|-----------|----------|------------------|------------------------------------------------------------------------------------------------------------|----------------------------------|
| SORT1              | rs7528419                                          | 1   | 109817192 | 1p13.3   | 2.0E-23          | Exonic (3' UTR) to CELSR2, downstream off PSRC1, 25 kb downstream of SORT1. 300kb upstream of GSTM4, GSTM3 | <i>CELSR2, PSRC1*, SORT1</i>     |
| SWAP70             | rs10840293                                         | 11  | 9751196   | 11p15.4  | 1.3E-08          | intronic to SWAP70                                                                                         | <i>SWAP70*, ADM, AC026250.16</i> |
| TCF21              | rs12202017                                         | 6   | 134173151 | 6q23.2   | 2.0E-11          | Intronic to TARID, 3' end of LINC01312                                                                     | <i>TCF21</i>                     |
| TRIB1              | rs2954029                                          | 8   | 126490972 | 8q24.13  | 2.6E-06          | downstream 40kb of TRIB1                                                                                   |                                  |
| UBE2Z              | rs46522                                            | 17  | 46988597  | 17q21.32 | 1.8E-05          | Intronic to UBE2Z, downstream of SNF8 and ATP5G1                                                           | <i>UBE2Z*</i>                    |
| VAMP5-VAMP8-GGCX   | rs7568458                                          | 2   | 85788175  | 2p11.2   | 3.6E-10          | Intronic to GGCX, upstream of VAMP8, VAMP5                                                                 | <i>VAMP8*, GGCX*, VAMP5</i>      |
| WDR12              | chr2:203828796 :I<br>rs6725887<br>or perfect alias | 2   | 203828796 | 2q33.1   | 2.2E-18          | Intronic to CARF( aka ALS2CR8)                                                                             |                                  |
| ZC3HC1             | rs11556924                                         | 7   | 129663496 | 7q32.2   | 5.3E-11          | exonic to ZC3HC1, 40 kb upstream of KLHDC10                                                                |                                  |
| ZEB2-ACO74093.1    | rs17678683                                         | 2   | 145286559 | 2q22.3   | 3.0E-09          | intronic to LINC01412                                                                                      |                                  |
| ZNF259-APOA5-APOA1 | rs964184                                           | 11  | 116648917 | 11q23.3  | 5.6E-05          | exonic to ZPR1 (3' UTR),200kb distant from SIDT2, TAGLN, PCSK7                                             |                                  |
| ZNF507-LOC400684   | rs12976411                                         | 19  | 32882020  | 19q13.11 | 9.1E-03          | intronic to LOC400684, downstream of ZNF507                                                                |                                  |

-Locus Name, New Lead variant, Reported p-value as described in reference<sup>12</sup>

-Published eGenes<sup>11-13</sup>

**Table S12. Targets of eQTLs in strong LD ( $R^2 \geq 90\%$ ) with Published Risk Lead Variant by Locus.**

| Locus Name          | Risk Lead Variant | Best eQTL         | LD $R^2$ | Target Gene Symbol          | Transcript Cluster ID | Trans? | Lead eQTL <sup>c</sup> | P-value |
|---------------------|-------------------|-------------------|----------|-----------------------------|-----------------------|--------|------------------------|---------|
| ABO                 | rs2519093         | rs600038          | 97%      | <i>ABO</i> <sup>a</sup>     | 3228582               |        | LV                     | 2.2E-12 |
| ADAMTS7             | rs4468572         | rs7166764         | 100%     | <i>CTSH</i>                 | 3634811               |        |                        | 2.5E-39 |
| ANKS1A              | rs17609940        | rs12201824        | 92%      | <i>SNRPC</i>                | 2904248               |        |                        | 2.9E-07 |
| ATP2B1              | rs2681472         | rs11105337        | 100%     | <i>POC1B-GALNT4</i>         | 3464967               |        |                        | 2.5E-06 |
| "                   | "                 | rs111478946       | 100%     | <i>ATP2B1</i> <sup>d</sup>  | 3464983               |        |                        | 3.8E-05 |
| CYP17A1-CNNM2-NT5C2 | rs11191416        | rs11191582        | 92%      | <i>NT5C2</i>                | 3304624               |        |                        | 8.7E-54 |
| "                   | "                 | rs4409766         | 92%      | <i>AS3MT</i>                | 3261923               |        | LV2                    | 8.1E-07 |
| "                   | "                 | rs17115100        | 100%     | <i>WBP1L</i>                | 3261886               |        |                        | 8.7E-05 |
| "                   | "                 | rs7475853         | 92%      | <i>RNF103-CHMP3</i>         | 2562821               | TRANS  | LV                     | 4.7E-08 |
| IL6R                | rs6689306         | rs11265612        | 94%      | <i>IL6R</i> <sup>a</sup>    | 2360257               |        | LV                     | 4.8E-24 |
| KCNE2               | rs28451064        | <b>rs28451064</b> | 100%     | <i>SLC5A3</i>               | 3919033               |        |                        | 5.2E-06 |
| LDLR                | rs1122608         | rs112186070       | 100%     | <i>SMARCA4</i> <sup>a</sup> | 3820921               |        |                        | 4.5E-20 |
| LIPA                | rs1412444         | rs1412445         | 100%     | <i>LIPA</i>                 | 3299585               |        | LV                     | <1E-450 |
| LPL                 | rs264             | <b>rs264</b>      | 100%     | <i>LPL</i> <sup>a</sup>     | 3088486               |        |                        | 6.0E-41 |
| MIA3                | rs67180937        | rs17163358        | 100%     | <i>FAM177B</i>              | 2381903               |        |                        | 4.7E-27 |
| MRAS                | rs139016349       | rs2306374         | 100%     | <i>MRAS</i> <sup>b</sup>    | 2644565               |        | LV                     | 1.0E-11 |
| "                   | "                 | rs6807945         | 97%      | <i>CEP70</i>                | 2697490               |        |                        | 3.4E-06 |
| "                   | "                 | rs6807945         | 97%      | <i>DBR1</i>                 | 2697331               |        |                        | 7.0E-05 |
| REST-NOA1           | rs17087335        | rs6554401         | 100%     | <i>REST</i> <sup>a</sup>    | 2728408               |        |                        | 4.4E-05 |
| "                   | "                 | rs56281640        | 97%      | <i>GDAP1</i>                | 3103607               | TRANS  | LV                     | 1.6E-21 |

| Locus Name | Risk Lead Variant | Best eQTL         | LD R <sup>2</sup> | Target Gene Symbol           | Transcript Cluster ID | Trans? | Lead eQTL <sup>c</sup> | P-value  |
|------------|-------------------|-------------------|-------------------|------------------------------|-----------------------|--------|------------------------|----------|
| "          | "                 | rs6852182         | 97%               | <i>CACNA1E</i>               | 2370433               | TRANS  | LV                     | 1.5E-08  |
| SH2B3      | rs3184504         | <b>rs3184504</b>  | 100%              | <i>OAS2</i>                  | 3432514               |        | LV                     | 7.8E-11  |
| "          | "                 | rs7137828         | 100%              | <i>SH2B3</i>                 | 3431892               |        |                        | 2.7E-06  |
| "          | "                 | <b>rs3184504</b>  | 100%              | <i>GBP5</i>                  | 2422035               | TRANS  | LV                     | 7.9E-25  |
| "          | "                 | <b>rs3184504</b>  | 100%              | <i>STAT1</i>                 | 2592268               | TRANS  | LV                     | 4.0E-17  |
| "          | "                 | <b>rs3184504</b>  | 100%              | <i>GBP7</i>                  | 2421925               | TRANS  | LV                     | 3.0E-13  |
| "          | "                 | <b>rs3184504</b>  | 100%              | <i>GBP1</i>                  | 2421883               | TRANS  | LV                     | 2.4E-12  |
| "          | "                 | rs7310615         | 100%              | <i>GBP4</i>                  | 2421995               | TRANS  | LV                     | 4.6E-12  |
| "          | "                 | <b>rs3184504</b>  | 100%              | <i>PSTPIP2</i>               | 3806211               | TRANS  | LV                     | 3.2E-11  |
| "          | "                 | rs597808          | 98%               | <i>ATP2B1</i> <sup>d</sup>   | 3464983               | TRANS  | LV                     | 5.1E-11  |
| "          | "                 | <b>rs3184504</b>  | 100%              | <i>MYADM</i> <sup>d</sup>    | 3841076               | TRANS  | LV                     | 1.3E-10  |
| "          | "                 | <b>rs3184504</b>  | 100%              | <i>FCGR1B</i>                | 2357845               | TRANS  | LV                     | 2.6E-10  |
| "          | "                 | <b>rs3184504</b>  | 100%              | <i>TAGAP</i> <sup>d</sup>    | 2982076               | TRANS  |                        | 4.0E-10  |
| "          | "                 | rs7310615         | 100%              | <i>USP4</i>                  | 2674179               | TRANS  | LV                     | 2.2E-08  |
| "          | "                 | rs597808          | 98%               | <i>CRIP1</i> <sup>d</sup>    | 3554851               | TRANS  | LV                     | 3.3E-08  |
| "          | "                 | rs7310615         | 100%              | <i>RICTOR</i>                | 2854241               | TRANS  |                        | 3.8E-08  |
| "          | "                 | rs7310615         | 100%              | <i>OBFC1</i>                 | 3305017               | TRANS  | LV                     | 3.8E-08  |
| "          | "                 | rs597808          | 98%               | <i>MX2</i>                   | 3922037               | TRANS  | LV                     | 4.2E-08  |
| "          | "                 | rs7310615         | 100%              | <i>ARHGEF40</i> <sup>d</sup> | 3527864               | TRANS  | LV                     | 6.7E-08  |
| SMG6       | rs216172          | rs216185          | 91%               | <i>SRR</i>                   | 3706219               |        |                        | 1.5E-24  |
| SORT1      | rs7528419         | rs646776          | 100%              | <i>PSRC1</i> <sup>a</sup>    | 2426951               |        | LV                     | 1.1E-12  |
| SWAP70     | rs10840293        | <b>rs10840293</b> | 100%              | <i>SWAP70</i> <sup>a</sup>   | 3319997               |        |                        | 1.5E-25  |
| UBE2Z      | rs46522           | rs9747646         | 100%              | <i>UBE2Z</i> <sup>a b</sup>  | 3725481               |        | LV                     | 3.2E-116 |
| "          | "                 | rs12601672        | 100%              | <i>SNF8</i>                  | 3761632               |        | LV                     | 2.4E-13  |
| "          | "                 | rs524808          | 96%               | <i>CALCOCO2</i>              | 3725392               |        |                        | 1.0E-05  |

| Locus Name           | Risk Lead Variant | Best eQTL        | LD R <sup>2</sup> | Target Gene Symbol          | Transcript Cluster ID | Trans? | Lead eQTL <sup>c</sup> | P-value  |
|----------------------|-------------------|------------------|-------------------|-----------------------------|-----------------------|--------|------------------------|----------|
| UBE2Z                | rs46522           | rs1973408        | 94%               | <i>ATP5G1</i>               | 3725456               |        | LV                     | 9.0E-05  |
| VAMP5-VAMP8-<br>GGCX | rs7568458         | rs12714145       | 90%               | <i>VAMP8</i> <sup>a b</sup> | 2491661               |        | LV                     | 9.0E-304 |
| "                    | "                 | rs12714145       | 90%               | <i>GGCX</i> <sup>a</sup>    | 2562343               |        | LV                     | 2.54E-51 |
| "                    | "                 | <b>rs7568458</b> | 100%              | <i>RNF181</i>               | 2491686               |        |                        | 5.7E-08  |
| "                    | "                 | <b>rs7568458</b> | 100%              | <i>DPEP3</i>                | 3696115               | TRANS  |                        | 2.9E-12  |
| "                    | "                 | rs12714145       | 90%               | <i>CRISPLD2</i>             | 3671935               | TRANS  |                        | 2.8E-08  |
| "                    | "                 | rs12714145       | 90%               | <i>SLC26A8</i>              | 2951730               | TRANS  |                        | 1.1E-07  |
| "                    | "                 | rs10172544       | 90%               | <i>PKN2</i>                 | 2345617               | TRANS  |                        | 1.1E-07  |
| "                    | "                 | rs10198569       | 90%               | <i>CASP5</i> <sup>d</sup>   | 3389330               | TRANS  | LV                     | 1.3E-07  |
| WDR12                | rs6725887         | rs149268645      | 100%              | <i>FAM117B</i>              | 2523354               |        |                        | 1.7E-81  |
| "                    | "                 | rs149846585      | 100%              | <i>CARF(ALS2CR8)</i>        | 2523419               |        | LV                     | 9.8E-41  |
| "                    | "                 | rs80087860       | 100%              | <i>NBEAL1</i>               | 2523478               |        |                        | 1.8E-08  |
| ZNF507-<br>LOC400684 | rs12976411        | rs16966931       | 100%              | <i>ZNF507</i>               | 3828887               |        |                        | 1.5E-09  |

- Locus Name, Risk Lead Variant from reference<sup>11</sup>

- LD R<sup>2</sup> – measured in FHS population between Risk Lead Variant and Best eQTL

<sup>a</sup> eGene is mentioned in recent papers<sup>11-13</sup>

<sup>b</sup> Polymorphism-in-Probe may affect cis-eQTL results (see Methods)

<sup>c</sup> LV means variance explained (R<sup>2</sup>) for Best eQTL as fraction of R<sup>2</sup> for lead eQTL for gene is >=90%.

<sup>d</sup> Genes found in Huan, et al<sup>14</sup> as significantly associated with blood pressure.
